# Supplementary material for: Highly crystalline N and S co-doped carbon dots as a selective turn off–on sensor for Cr(vi) and ascorbic acid and a turn off sensor for metanil yellow
Source: Royal Society of Chemistry journal article supplement (doi:10.1039/d1sd00042j), 2022-01-01
Supplement: d1sd00042j1.pdf [file d1sd00042j1.pdf]

## Highly crystalline N and S co-doped carbon dots as selective turn off-on sensor for Cr(VI) and ascorbic acid and turn off sensor for Metanil yellow

Ambreen Abbasi<sup>a</sup>, Mohammad Shakir<sup>a\*</sup>

<sup>a</sup>*Division of Inorganic Chemistry, Department of Chemistry, Aligarh Muslim University, Aligarh 202002, India.*

Tel: 00919837430035

Email: [shakir078@yahoo.com](mailto:shakir078@yahoo.com)

| S. No.   | CONTENTS                                                                                                                                  | Page No. |
|----------|-------------------------------------------------------------------------------------------------------------------------------------------|----------|
| S1       | Experimental                                                                                                                              | 3-5      |
| S2       | Detection limit of nanosensor NS CDs                                                                                                      | 5        |
| Fig. 1S  | Absorption spectrum of NS CDs                                                                                                             | 5        |
| Fig. 2S  | Emission spectrum of NS CDs at different excitation wavelengths.                                                                          | 6        |
| Fig. 3S  | Comparison of fluorescent intensity of NCDs and NS CDs                                                                                    | 7        |
| Fig. 4S  | EDX spectrum of NS CDs                                                                                                                    | 7        |
| Fig. 5S  | TGA spectrum of NS CDs                                                                                                                    | 8        |
| Fig 6S   | Effect of pH on fluorescent intensity of NS CDs                                                                                           | 9        |
| Fig 7S   | Effect of irradiation time on fluorescent intensity of NS CDs                                                                             | 10       |
| Fig 8S   | Effect of ionic strength on fluorescent intensity of NS CDs                                                                               | 11       |
| Fig. 9S  | Effect of pH on fluorescence intensity of nanosensor-Cr(VI) solution                                                                      | 12       |
| Fig. 10S | Kinetic characteristics of the florescence intensity of nanosensor with 50 $\mu$ M Cr(VI) solution and 150 $\mu$ M ascorbic acid          | 13       |
| Fig. 11S | Effect of other metal ions on fluorescent intensity of NS CDs (200 $\mu$ L, 2mg/ml).The concentrations of various metal ions 1500 $\mu$ M | 14       |

|          |                                                                                                                                                      |       |
|----------|------------------------------------------------------------------------------------------------------------------------------------------------------|-------|
| Fig. 12S | Interference spectrogram of NS CDs-Cr(VI)                                                                                                            | 15    |
| Fig 13S  | Effect of other reducing species on fluorescent intensity of NS CDs+Cr(VI) ensemble . The concentrations of various reducing species are 160 $\mu$ M | 16    |
| Fig. 14S | Effect of pH on fluorescence intensity of nanosensor- metanil yellow solution                                                                        | 17    |
| Fig 15S  | Effect of other dyes on fluorescent intensity of NS CDs                                                                                              | 18    |
| Fig 16S  | The stability of NS CDs-MY solution                                                                                                                  | 19    |
| Fig. 17S | Spectral overlap of absorption spectrum of Cr(VI) (blue) with emission (green ) and excitation spectrum( red) of NS CDs                              | 20    |
| Fig. 18S | Spectral overlap of absorption spectrum of Cr(VI) with emission and excitation spectrum of NCDs                                                      | 21    |
| Fig. 19S | Fluorescence quenching spectra of NCDs and NS CDs with Cr(VI)                                                                                        | 22    |
| Fig 20S  | Absorption spectrum of NS CDs in presence of increasing concentration of Cr(VI)                                                                      | 23    |
| Fig 21S  | Absorption spectrum of NCDs in presence of Cr(VI)                                                                                                    | 24    |
| Fig 22S  | Decay time profile of NS CDs in absence and presence of Cr(VI)                                                                                       | 25    |
| Fig 23S  | Absorption spectrum of NS CDs – Cr(VI)in presence of increasing concentration of ascorbic acid                                                       | 26    |
| Fig. 24S | Spectral overlap of absorption spectrum of Metanil Yellow (blue) with emission ( green ) and excitation spectrum (red) of nanosensor                 | 27    |
| Fig. 25S | Absorption spectrum of NS CDs – Cr(VI)in presence of increasing concentration of Metanil yellow.                                                     | 28    |
| Fig. 26S | Decay time profile of NS CDs in absence and presence of Metanil yellow.                                                                              | 29    |
| Fig. 27S | The relationship between fluorescence intensity v/s the amount of Metanil Yellow (0–0.8 mg per 1000 mg turmeric powder) added in Turmeric Powder.    | 30-31 |
| Table 1S | Integrated fluorescence intensity against absorbance of quinine sulfate and NS CDs                                                                   | 31-32 |

|            |                                                                                        |       |
|------------|----------------------------------------------------------------------------------------|-------|
| Table 2S   | Integrated fluorescence intensity against absorbance of quinine sulfate and NCDs       | 32-33 |
| Table 3S   | Comparison of methods for Cr(VI) determination                                         | 33-34 |
| Table 4S   | Comparison of methods for Metanil yellow determination                                 | 34    |
| Table 5S   | Triple exponential fitting parameters of NS CDs and ND CDs-Cr(VI) decay curves         | 34    |
| Table 6S   | Triple exponential fitting parameters of NS CDs and ND CDs-metanil yellow decay curves | 35    |
| References |                                                                                        | 35-36 |

## **S1 EXPERIMENTAL**

### *S1.1 Reagents*

Mesaconic acid, ethylenediamine and sulfuric acid were purchased from Sigma Aldrich and were used without further purification. Metanil Yellow was procured from TCI chemicals. All other chemicals not mentioned here were of analytical reagent grade and were obtained from Sigma Aldrich and were used as received. Double distilled water was used in the synthesis of nanosensor

### *S1.2 Instrumentations*

The Hitachi F-2700 spectrometer was used to record fluorescence spectra. Electronic spectral studies were done on a Perkin Elmer Lambda 365 UV-VIS spectrometer. FT-IR spectrum was obtained from Perkin Elmer Spectrum Two FT-IR Spectrometer. EDX spectrum was obtained on JSM-6510LV, JEOL, Japan. TEM was carried out in a JEM-2100F JEOL, Japan operating at the maximum accelerating voltage of 200 kV. For this, 5  $\mu$ L of the sample was drop coated on a carbon-coated copper TEM grid followed by air drying. Acquired micrographs were analyzed using ImageJ (<http://imagej.nih.gov/ij/download.html>) by randomly selecting individual nanoparticles in the TEM images to compute size distribution histograms. X-ray diffraction experiments were carried out using SMARTLAB Rigaku with Cu-K $\alpha$  radiation..

Flash EA 1112 analyzer was employed to carry out elemental analysis. Fluorescence lifetime measurements were done on HORIBA Jobin Yvon Fluorocube-01-NL fluorescence lifetime by using Time correlated Single Photon Counting (TCSPC) method.

### *S1.3 Preparation of test solutions and general procedure for UV-Vis and fluorescence spectrometry determination*

For determination of Cr(VI) and Metanil yellow, 3ml of double distil water was mingled with 200  $\mu$ L of 2mg/ml NS CDs, then series of appropriate volumes of 1mmol Cr(VI) and Metanil yellow were added and the fluorescent intensities were measured. For determination of ascorbic acid 3ml of double distil water was mingled with 200  $\mu$ L of 2mg/ml NS CDs. Then 150  $\mu$ M Cr(VI) was added in order to form nanoprobe (NS CDs/Cr(VI)). Then fluorescent intensities were recorded by adding appropriate volumes of 1mmol ascorbic acid.

### *S1.4 Synthesis of NS CDs*

NS CDs were synthesized by hydrothermal method. 2 gm mesaconic acid was dissolved in 50 ml of 15% EDA solution. The mixture was transferred to 100 ml Teflon lined stainless steel autoclave and heated constantly at 180<sup>0</sup>C for 10 hours. The mixture was cooled down naturally after reaction. Than 70% sulfuric acid was added to the mixture till the mixture becomes neutral. The resulting solution was kept in hot air oven at 60<sup>0</sup>C for 24 hours to obtain the NS CDs powder.

### *S 1.5 Detection of metanil yellow in turmeric powder sample*

Turmeric powder was purchased from a local supermarket and was confirmed that no metanil yellow dyes was claimed from their lists of ingredients. metanil yellow was spiked into the turmeric powder.

The samples for analysis were prepared by adding increasing amounts of metanil yellow (0.1 mg/1000 mg of sample) into turmeric powder. Samples were thoroughly mixed. The prepared mixtures were extracted ultrasonically by 30 ml distil watet for 30 minutes and centrifugal

sedimentation was carried out for 10 minutes at 10,000 rpm. Finally the supernatant (also called as extracted solution) was collected for detection. Fixed aliquots of extracted solution of different samples were added to NS CDs aqueous solution.

## **S2 DETECTION LIMIT OF NS CDs NANOSENSOR**

The detection limit was calculated based on fluorescence titration for tested analytes. To determine the  $\delta/S$  ratio, emission intensity of nanosensor without tested analytes was measured 10 times and standard deviation from blank measurements was determined. The detection limit was then calculated with the equation : detection limit =  $3 \delta/S$  where  $\delta$  is the standard deviation of blank measurements and S is the slope of intensity vs sample concentration.  $\delta$  from intensity measurements was calculated to be 2.5.

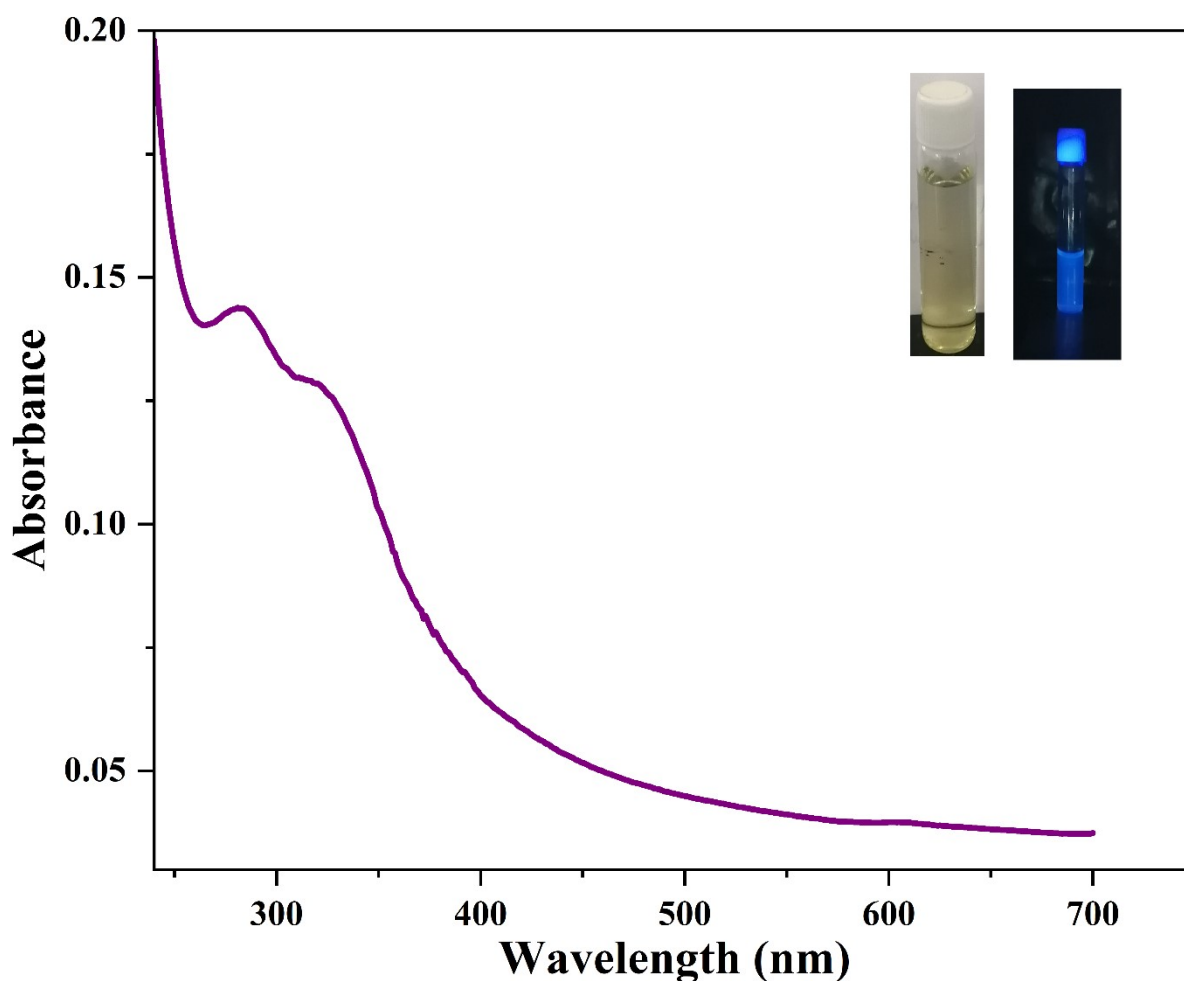

**Fig. 1S** Absorption spectrum of NS CDs

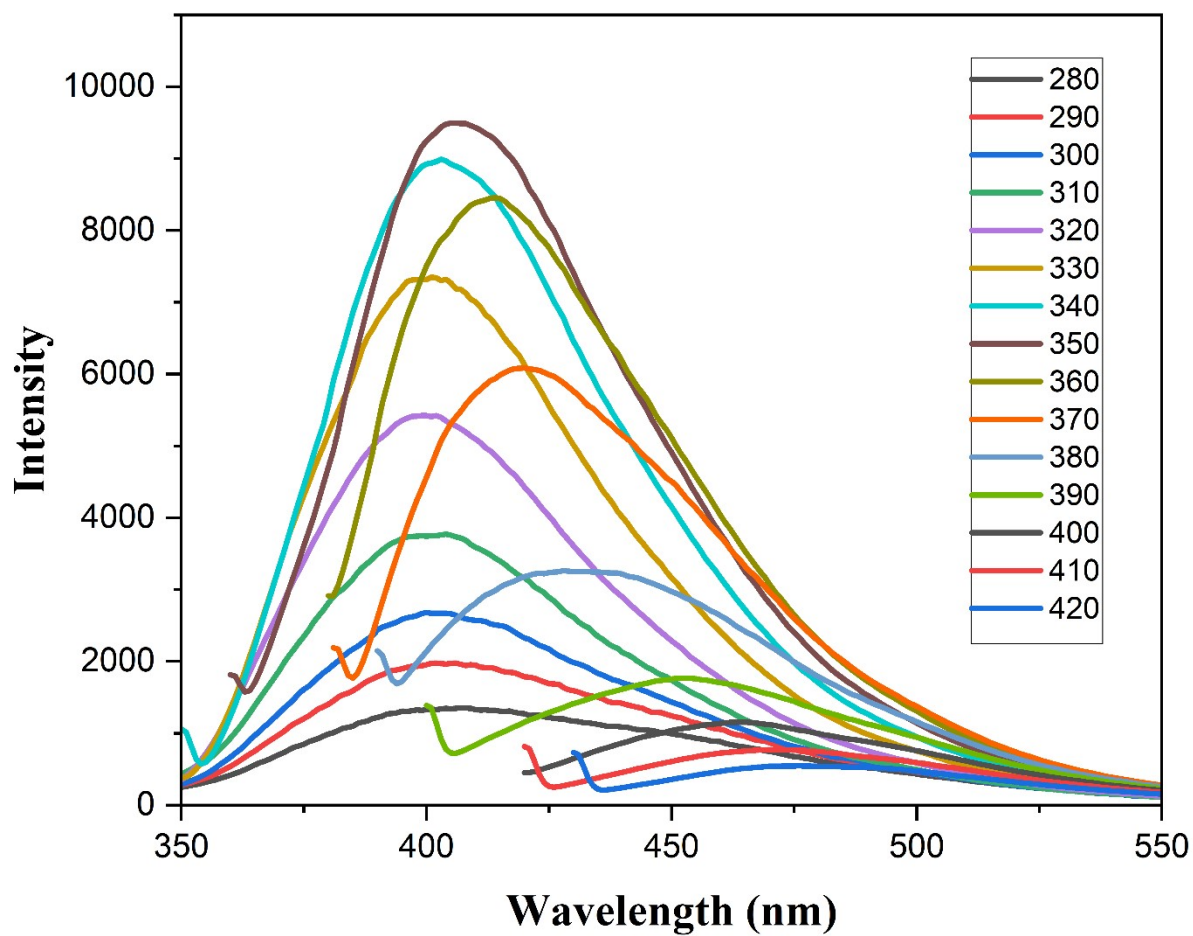

**Fig. 2S** Emission spectrum of NS CDs at different excitation wavelengths.

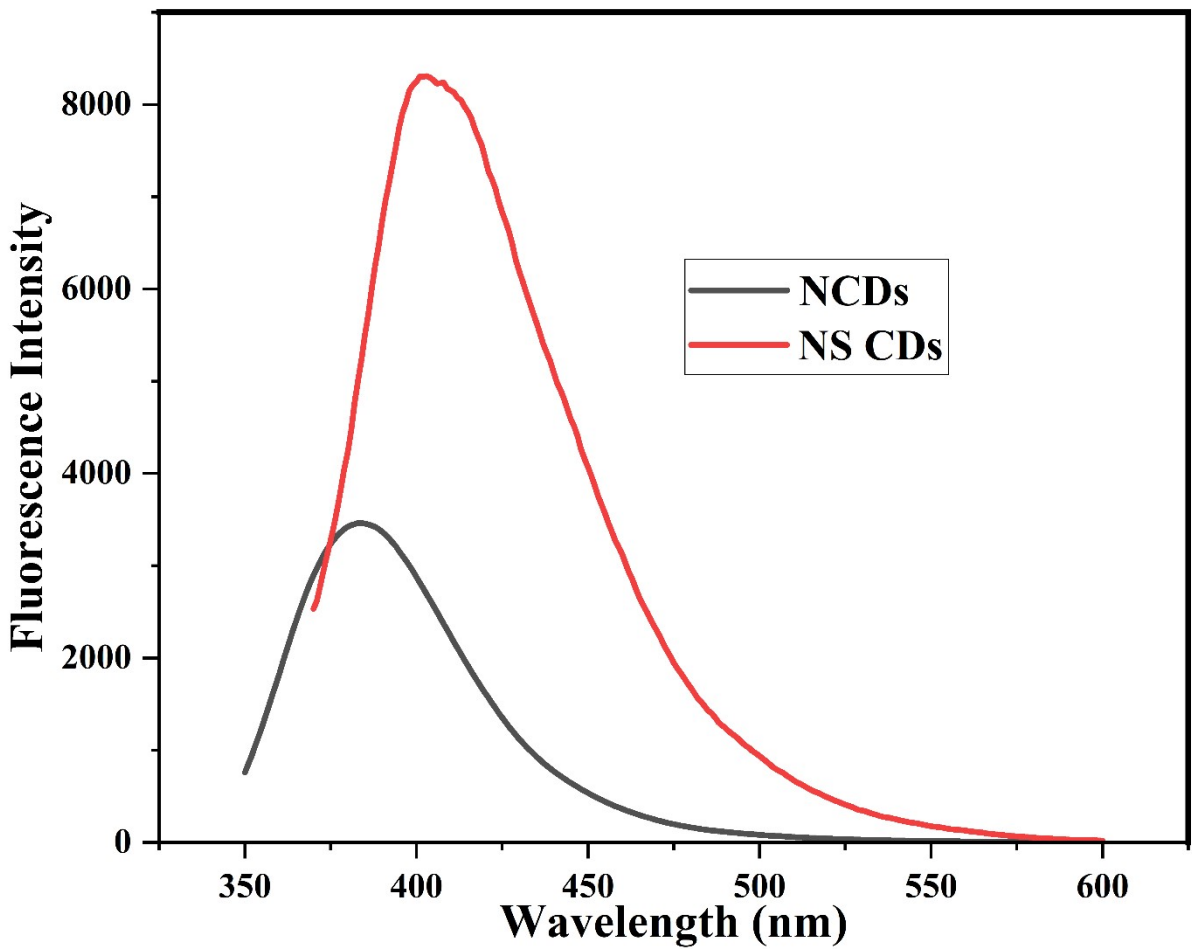

Fig. 3S Comparison of fluorescent intensity of NCDs and NS CDs.

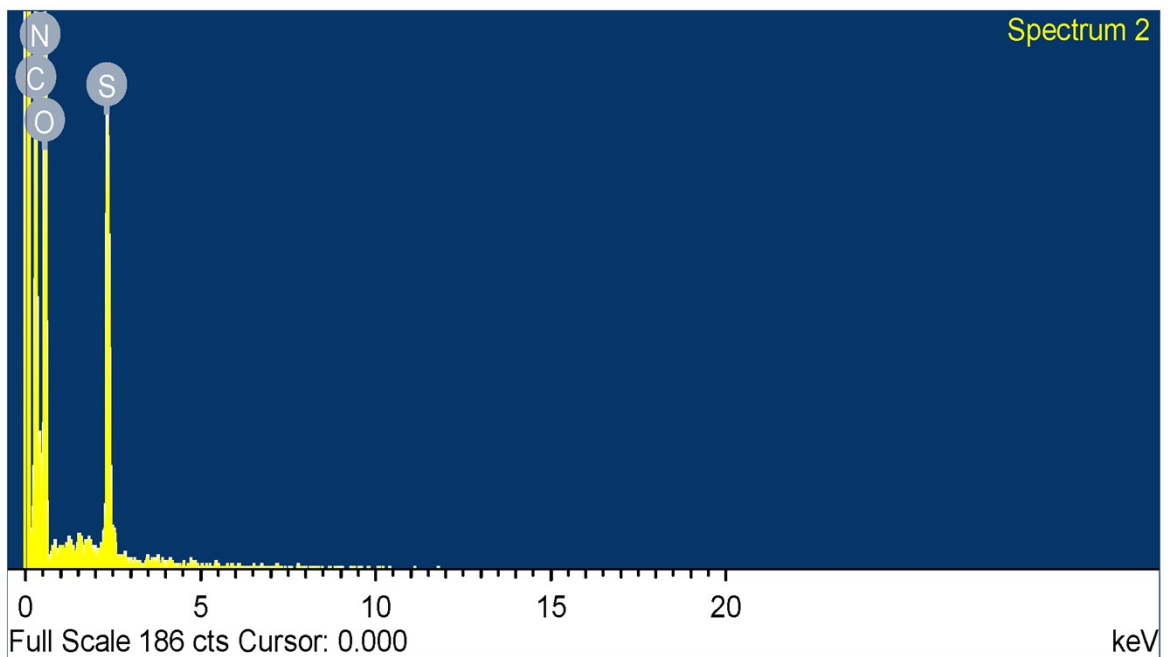

Fig. 4S EDX spectrum of NS CDs

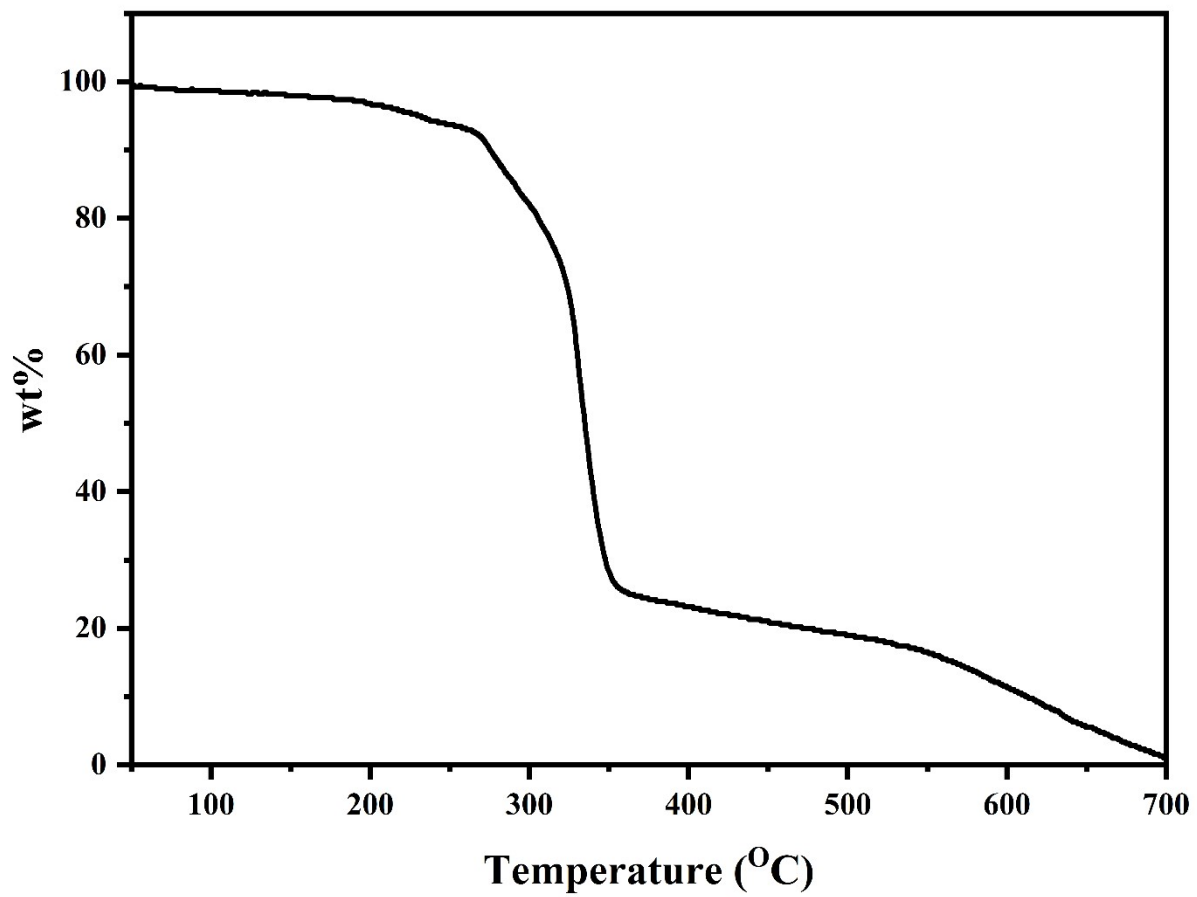

Fig. 5 TGA spectrum of NS CDs



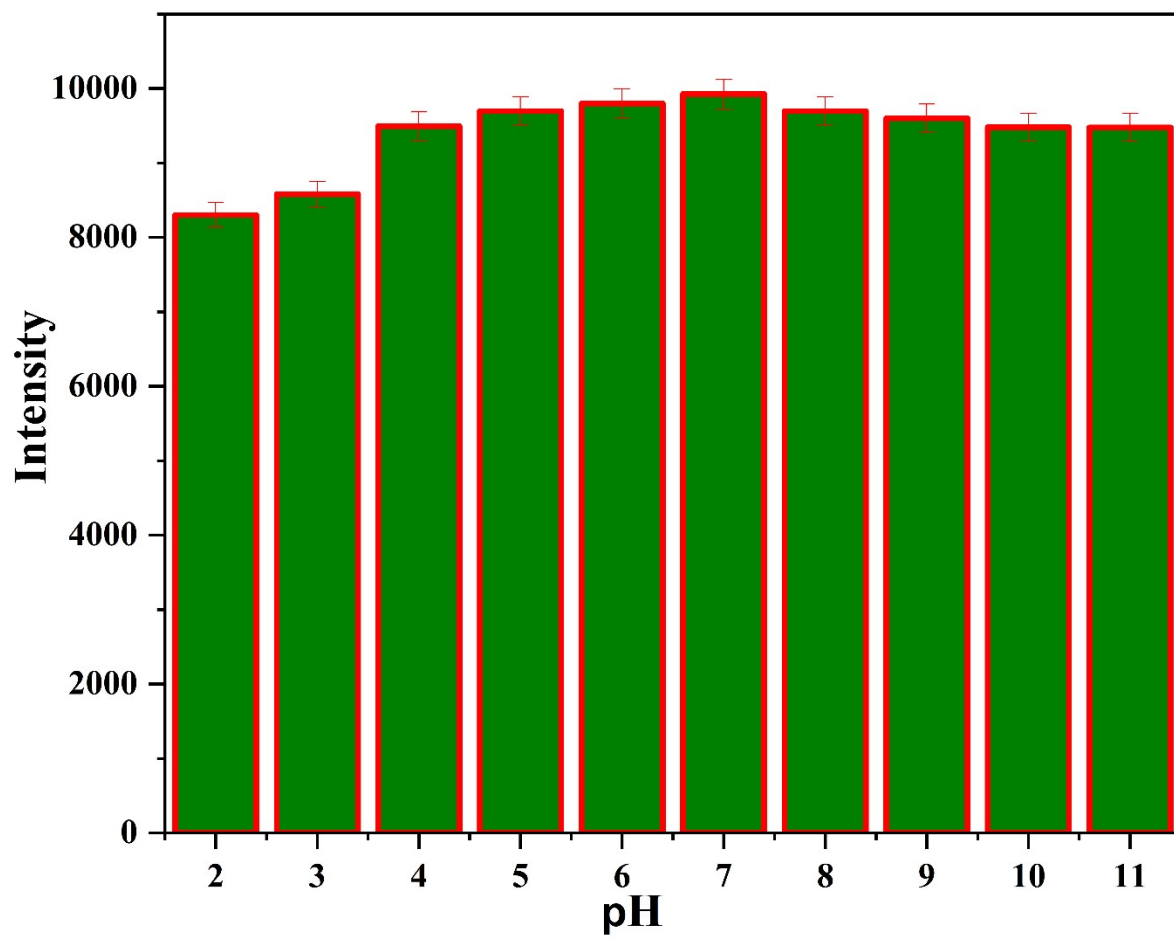

**Fig 6S** Effect of pH on fluorescent intensity of NS CDs

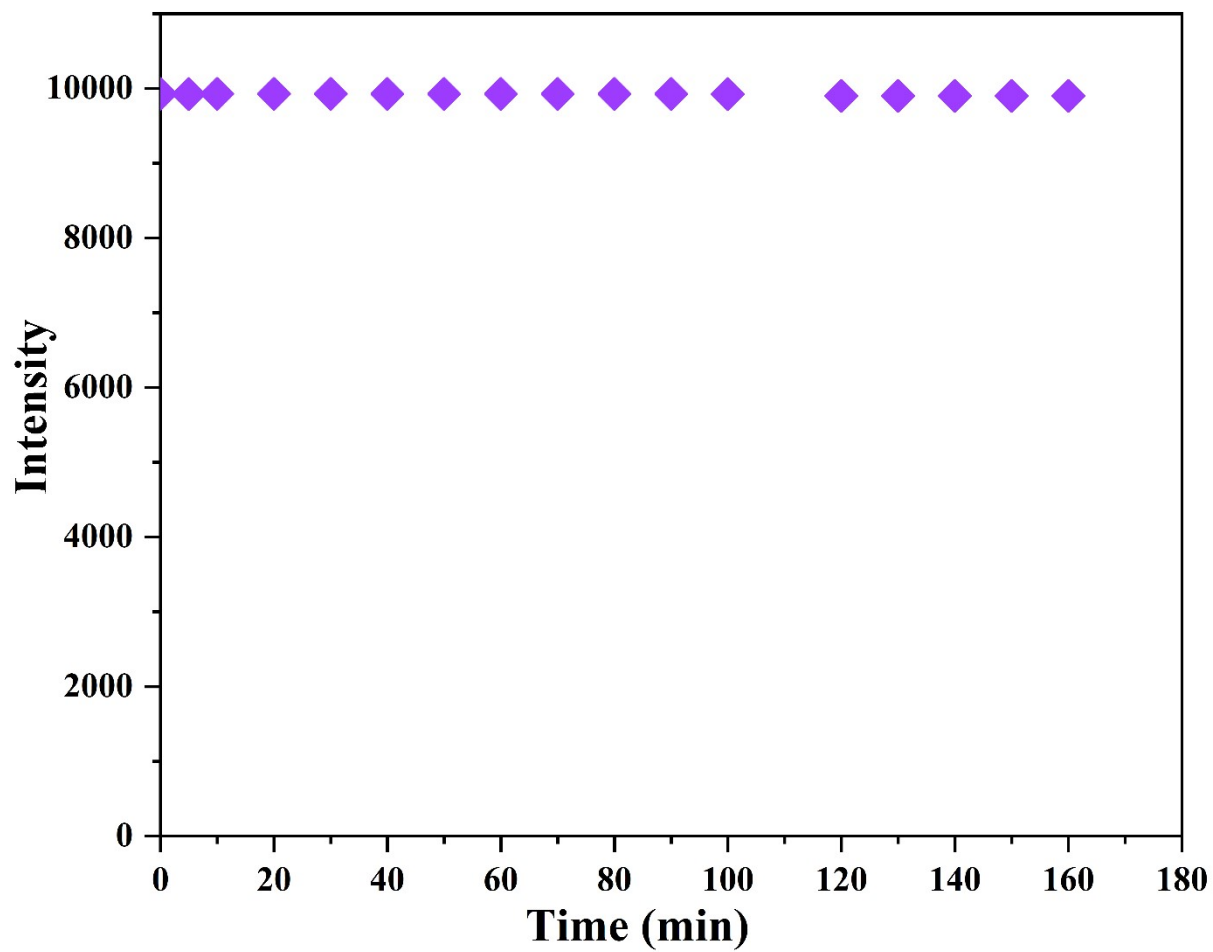

**Fig 7S** Effect of irradiation time on fluorescent intensity of NS CDs

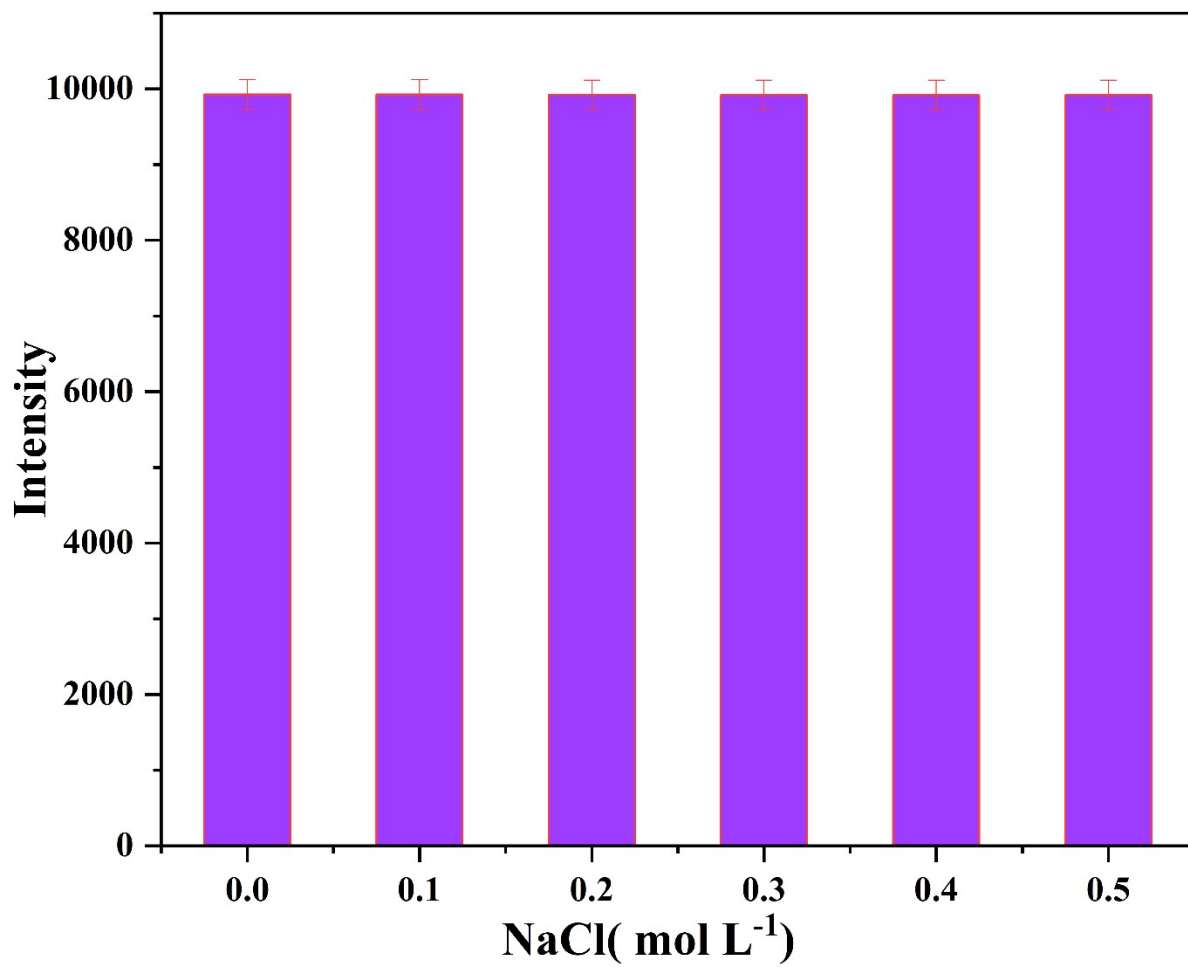

**Fig 8S** Effect of ionic strength on fluorescent intensity of NS CDs

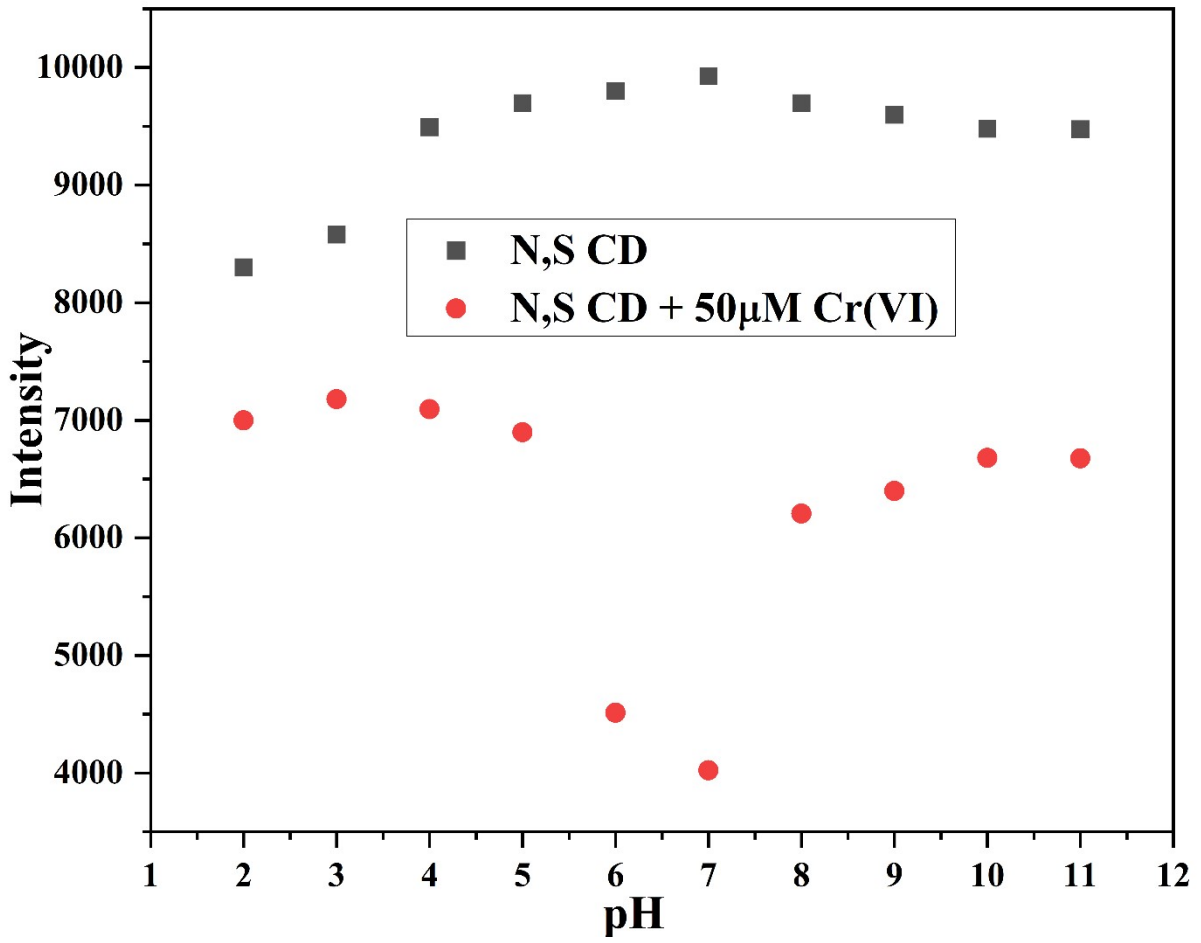

**Fig. 9** Effect of pH on fluorescence intensity of nanosensor-Cr(VI) solution

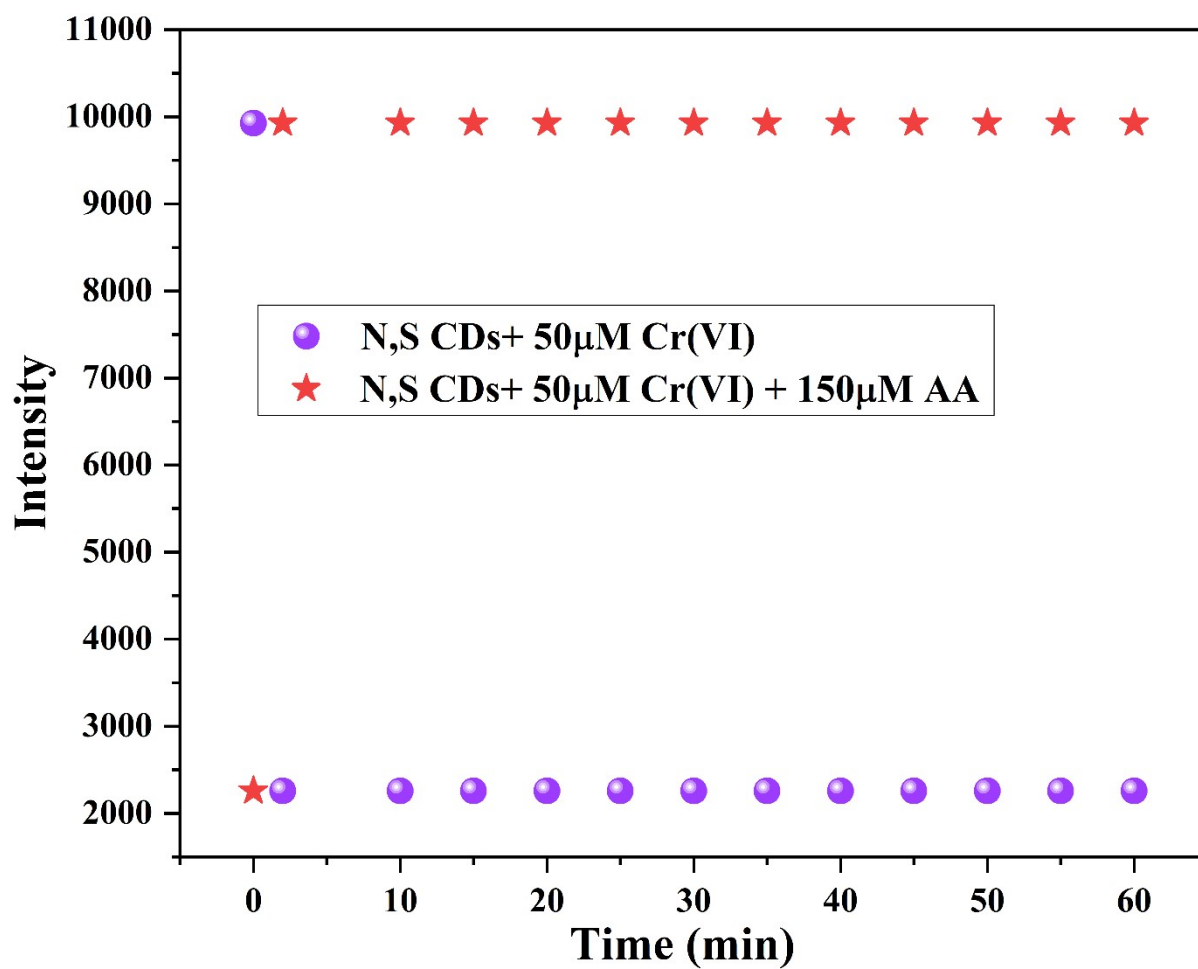

**Fig. 10S** Kinetic characteristics of the fluorescence intensity of nanosensor with 50  $\mu\text{M}$  Cr(VI) solution and 150  $\mu\text{M}$  ascorbic acid

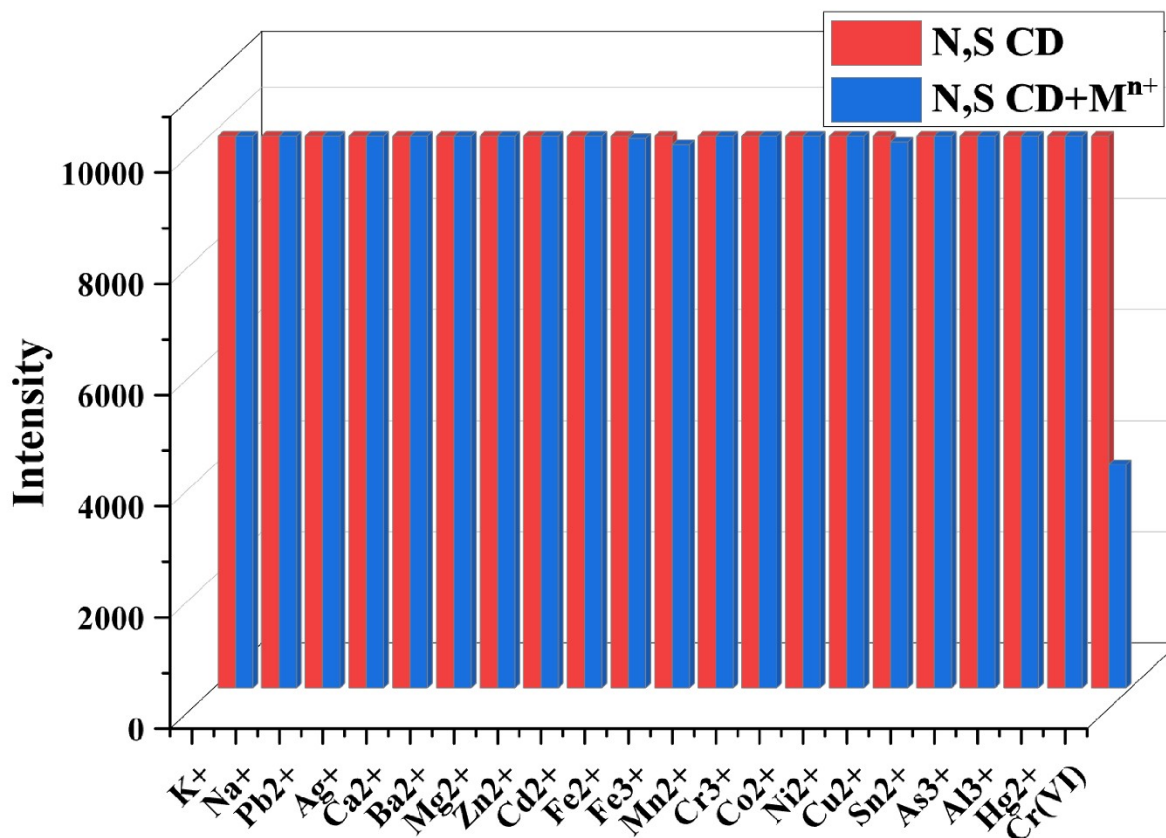

**Fig. 11S** Effect of other metal ions on fluorescent intensity of NS CDs (200 $\mu$ L, 2mg/ml).The concentrations of various metal ions 1500  $\mu$ M

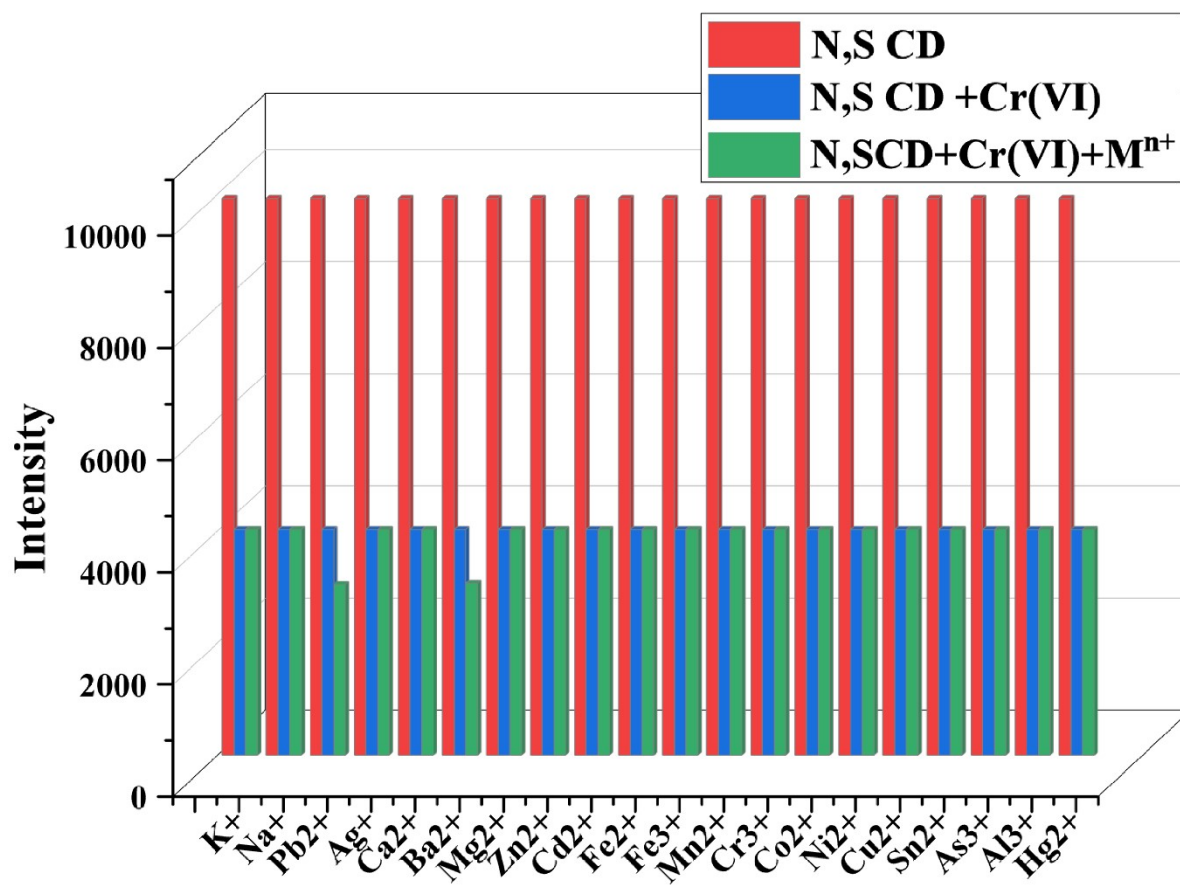

Fig. 12S Interference spectrogram of NS CDs-Cr(VI)

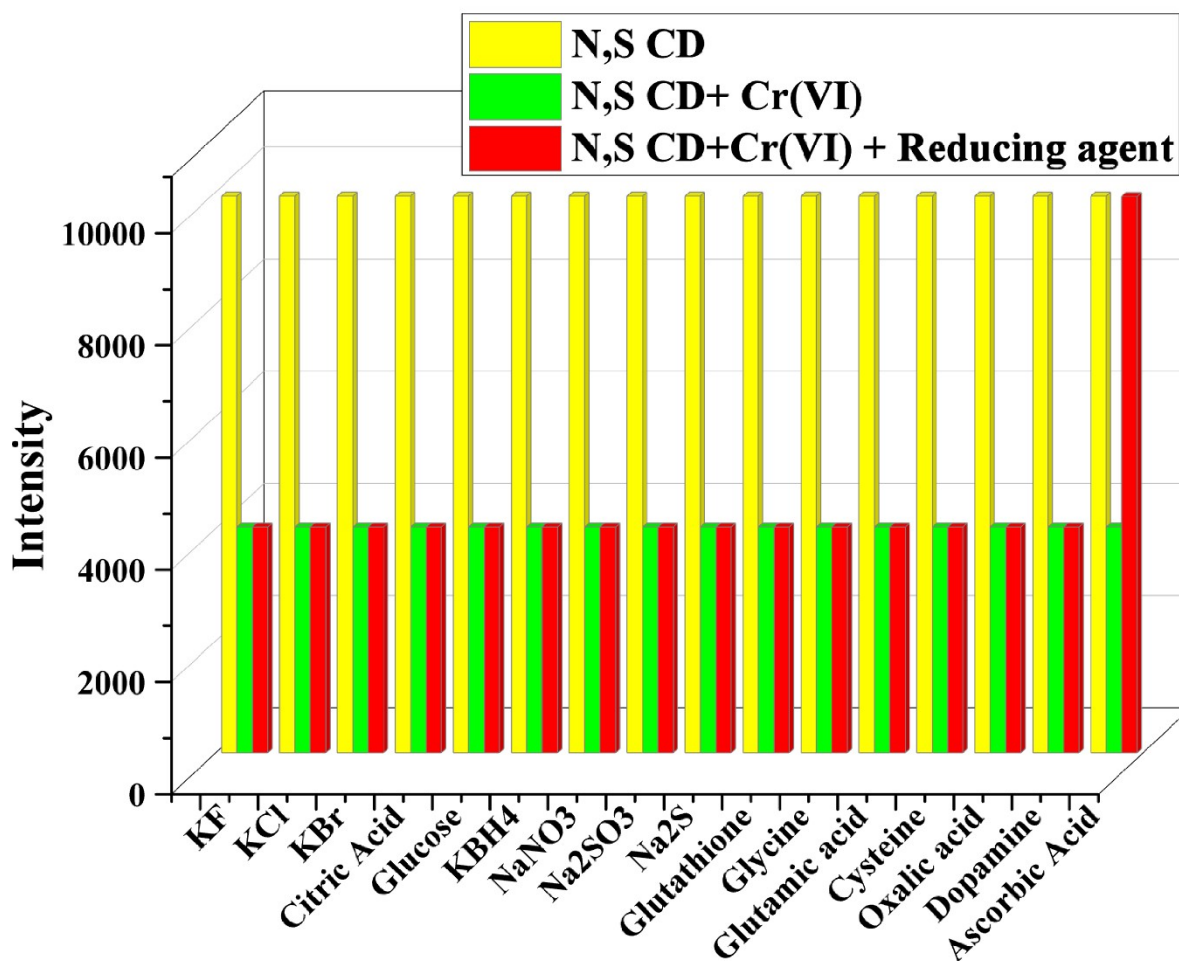

**Fig 13S** Effect of other reducing species on fluorescent intensity of NS CDs+Cr(VI) ensemble . The concentrations of various reducing species are 160  $\mu$ M



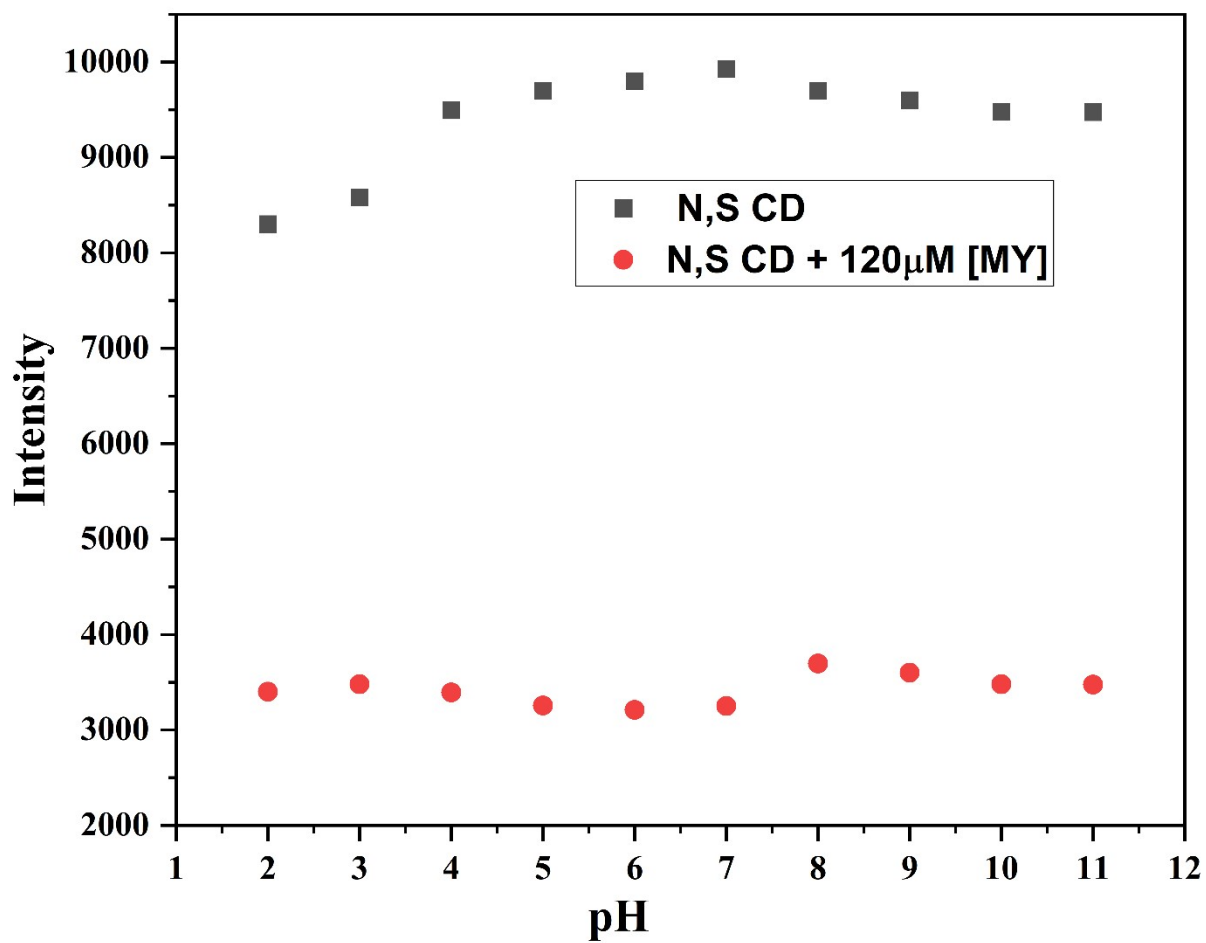

Fig. 14S Effect of pH on fluorescence intensity of nanosensor- metanil yellow solution.

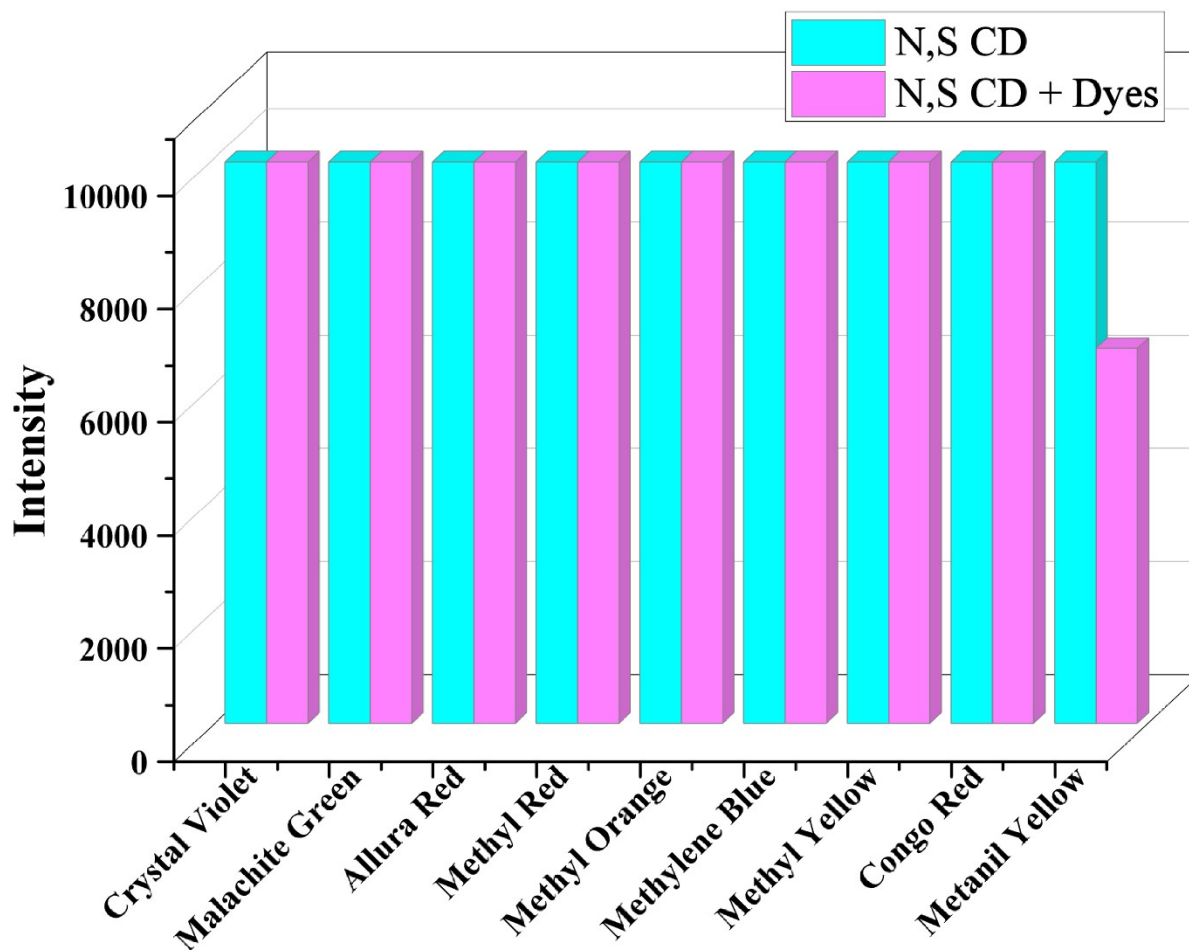

**Fig 15S** Effect of other dyes on fluorescent intensity of NS CDs

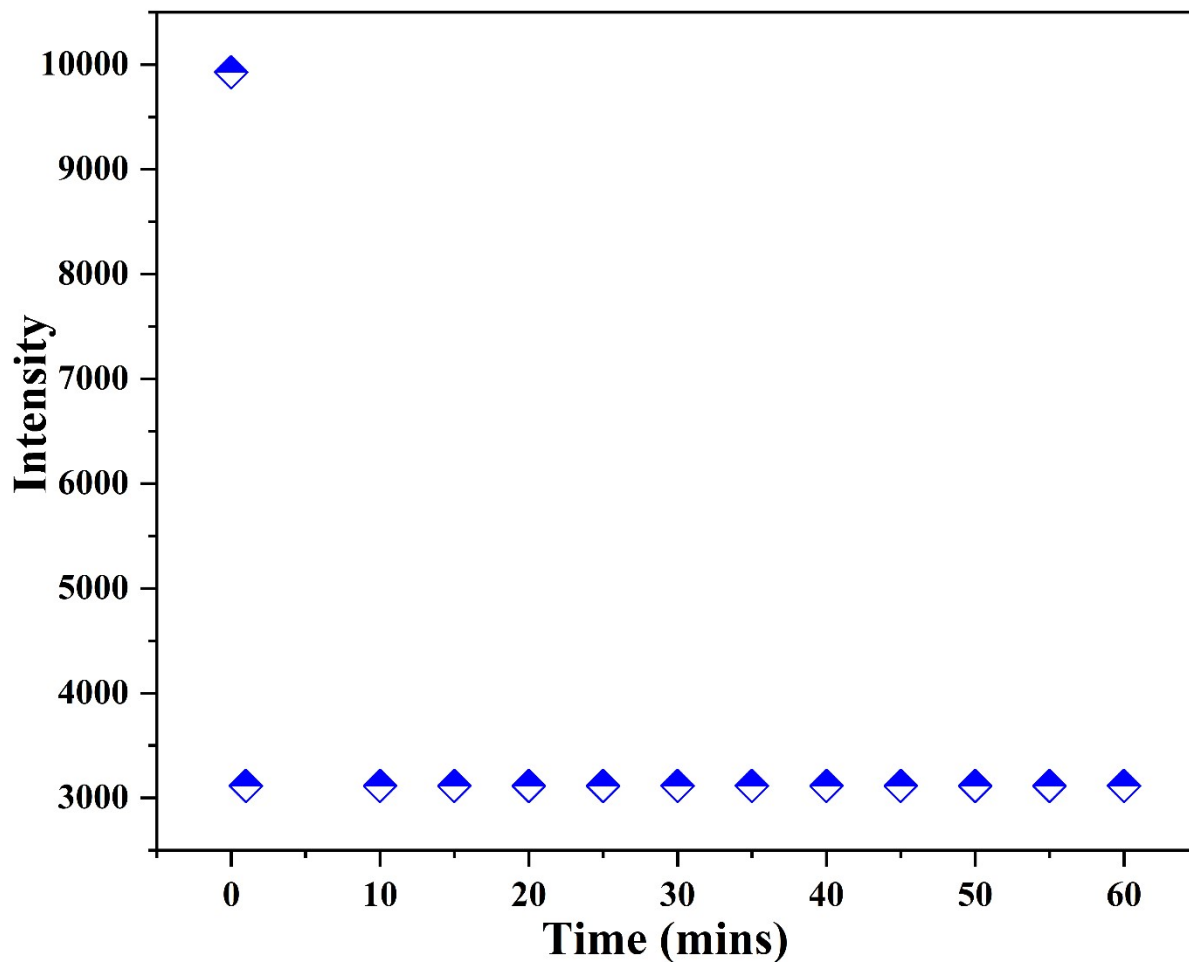

Fig 16S The stability of NS CDs-MY solution

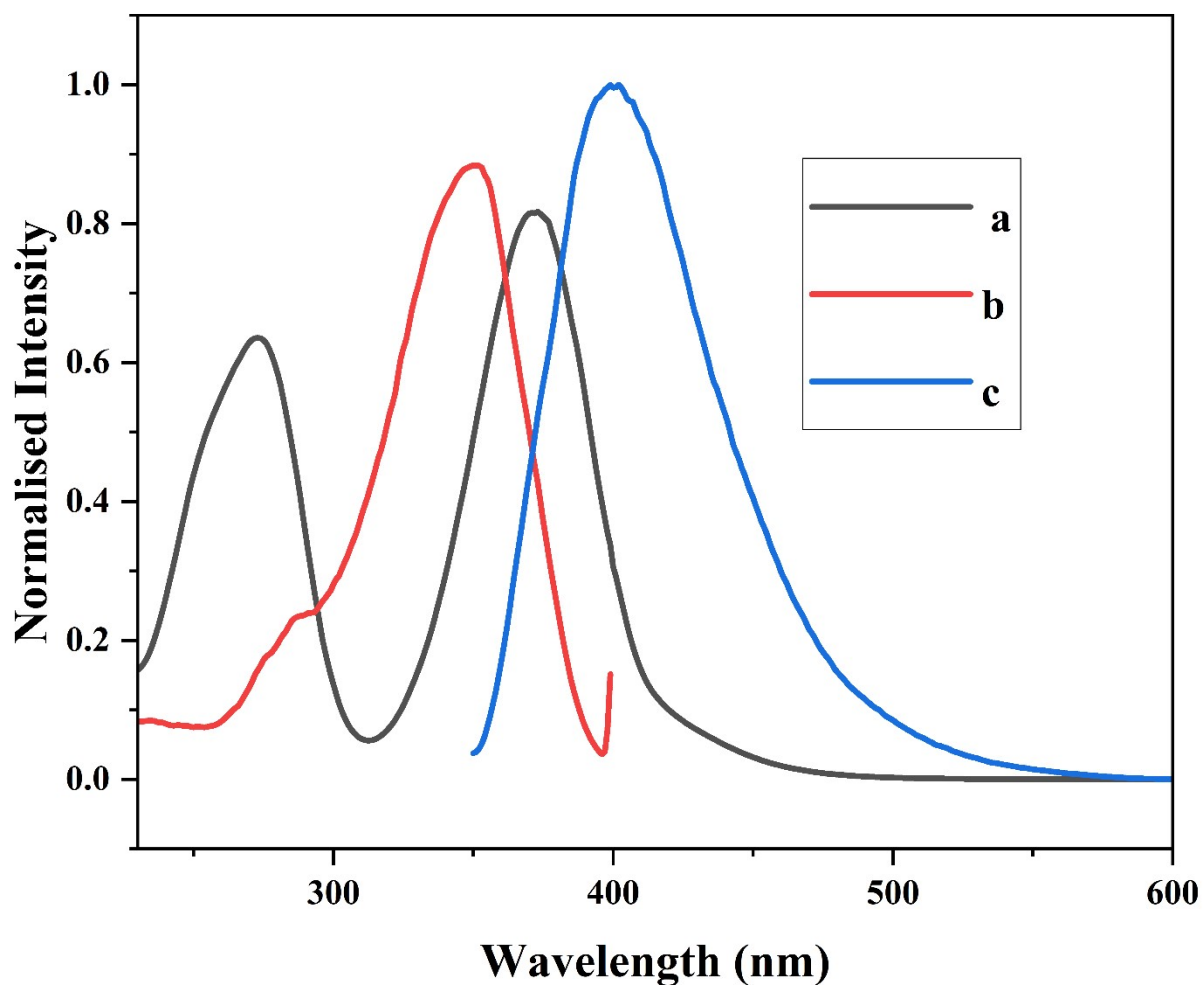

**Fig. 17S** Spectral overlap of absorption spectrum of Cr(VI) (a) with emission (c) and excitation spectrum (b) of NS CDs

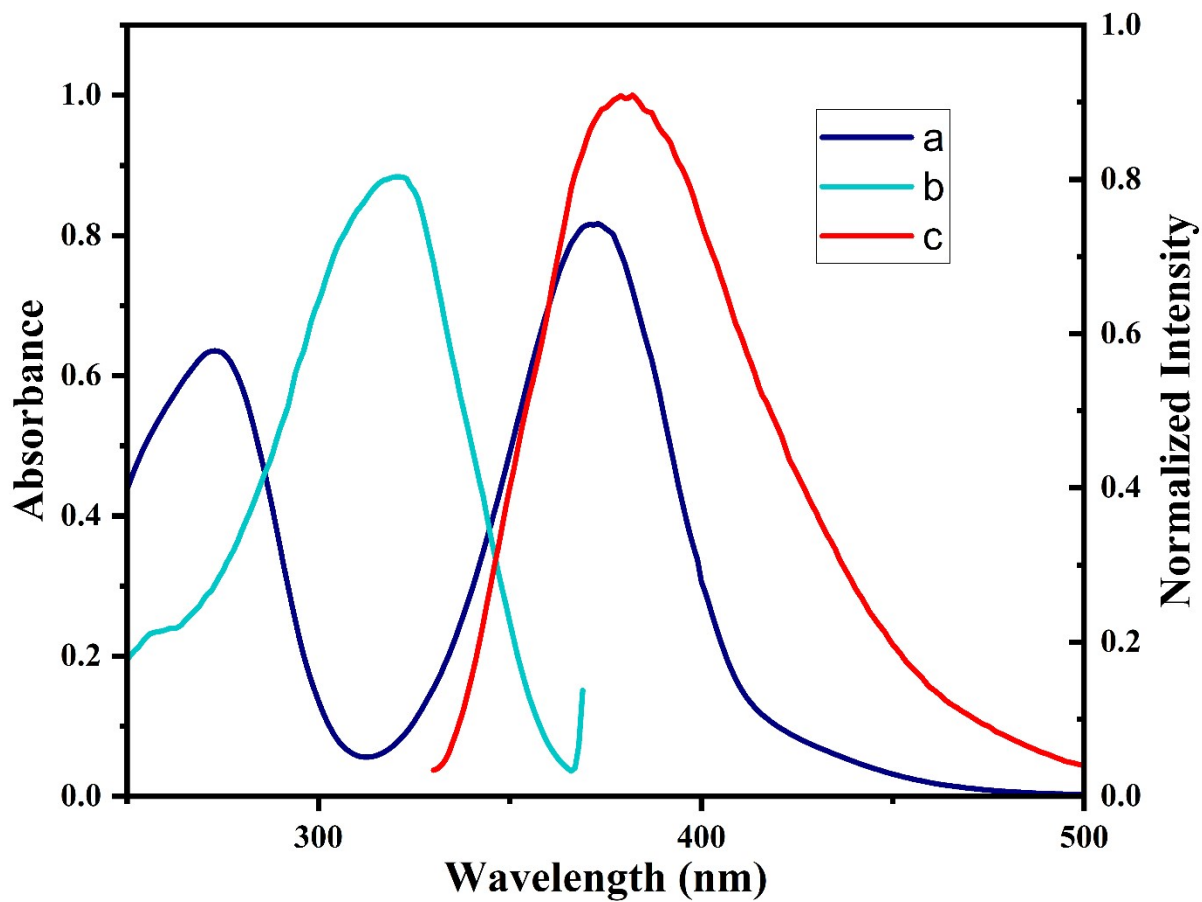

Fig. 18S Spectral overlap of absorption spectrum of Cr(VI) (a) with emission (c) and excitation spectrum( b) of NCDs

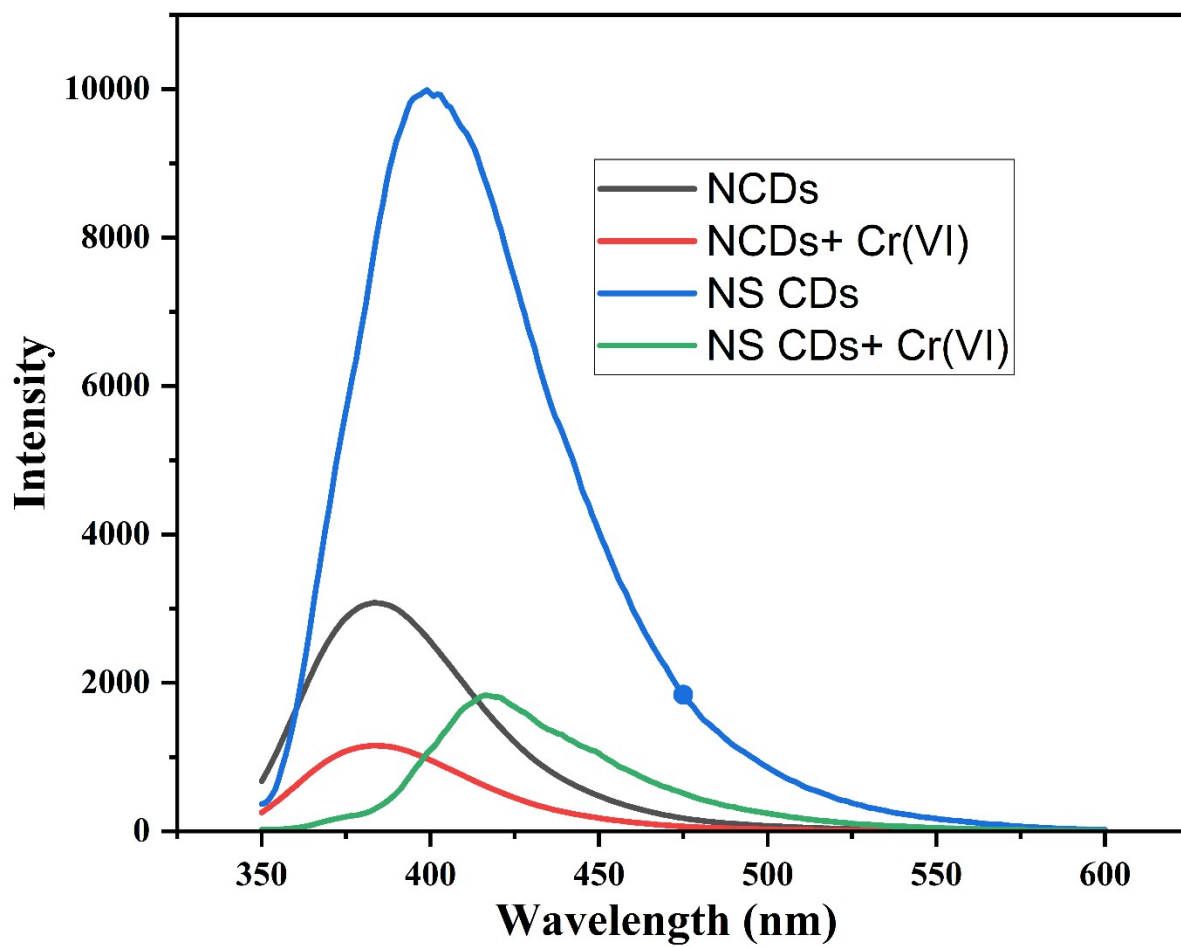

Fig 19S. Fluorescence quenching spectra of NCDs and NS CDs with Cr(VI).

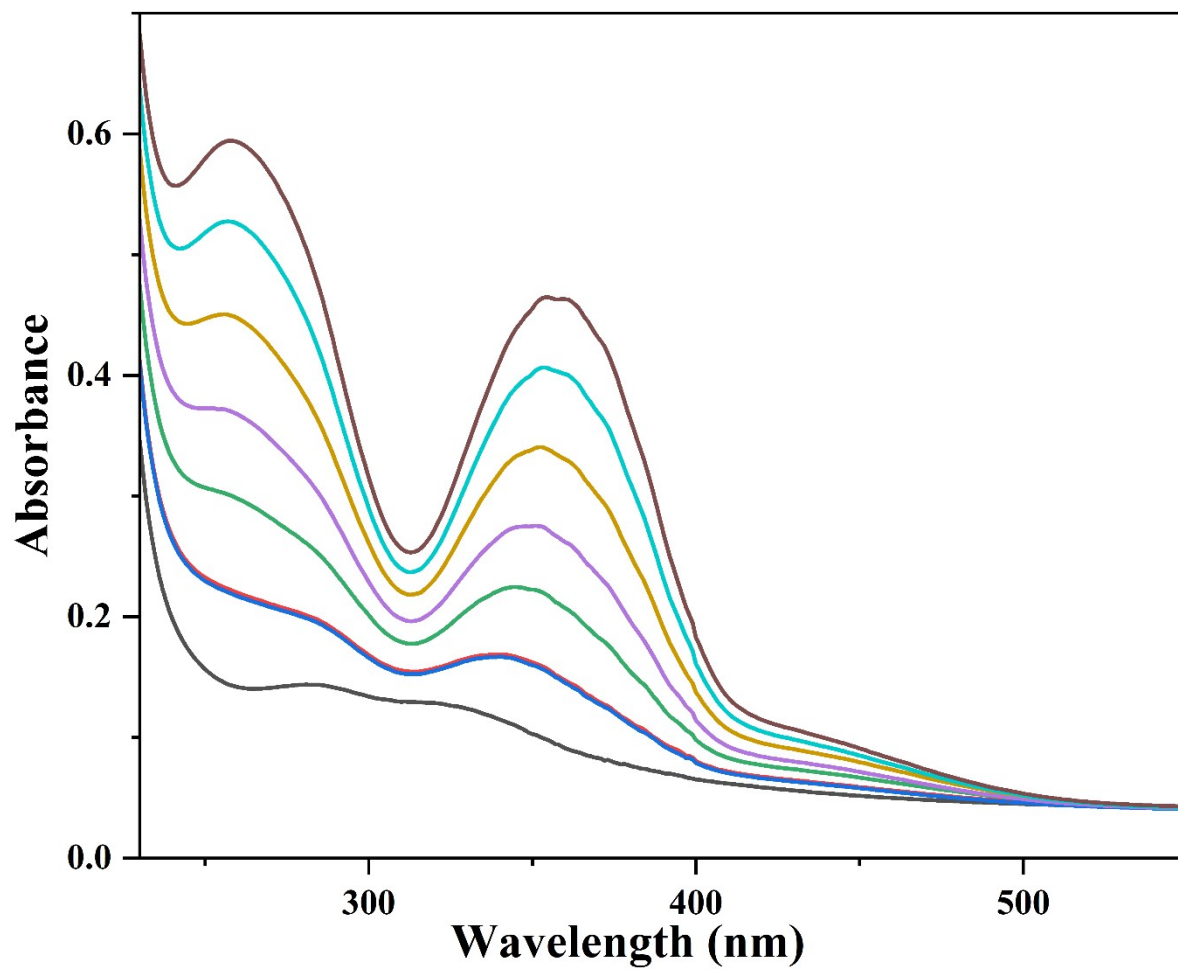

Fig 20S Absorption spectrum of NS CDs in presence of increasing concentration of Cr(VI)

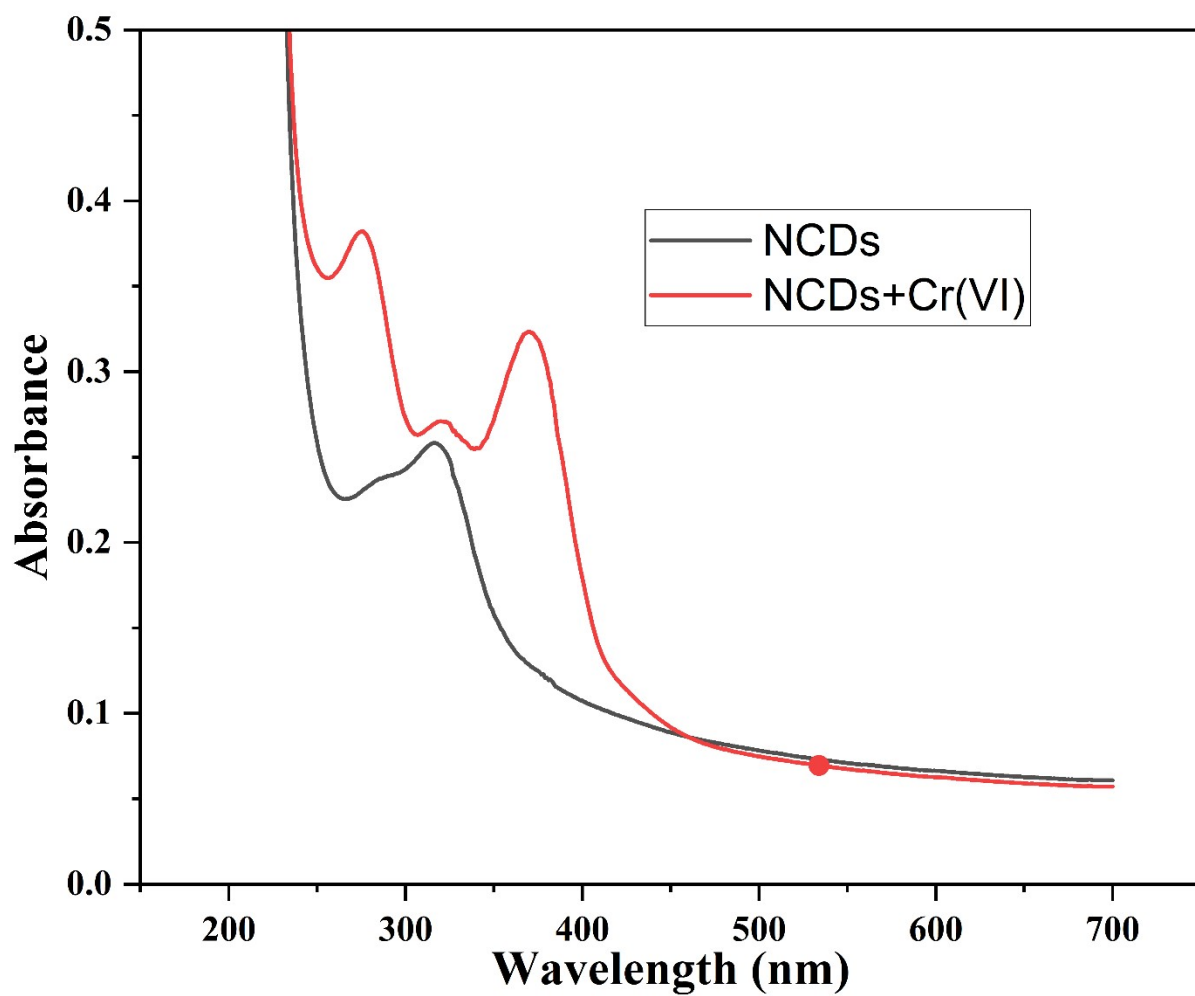

Fig 21S Absorption spectrum of NCDs in presence of Cr(VI)



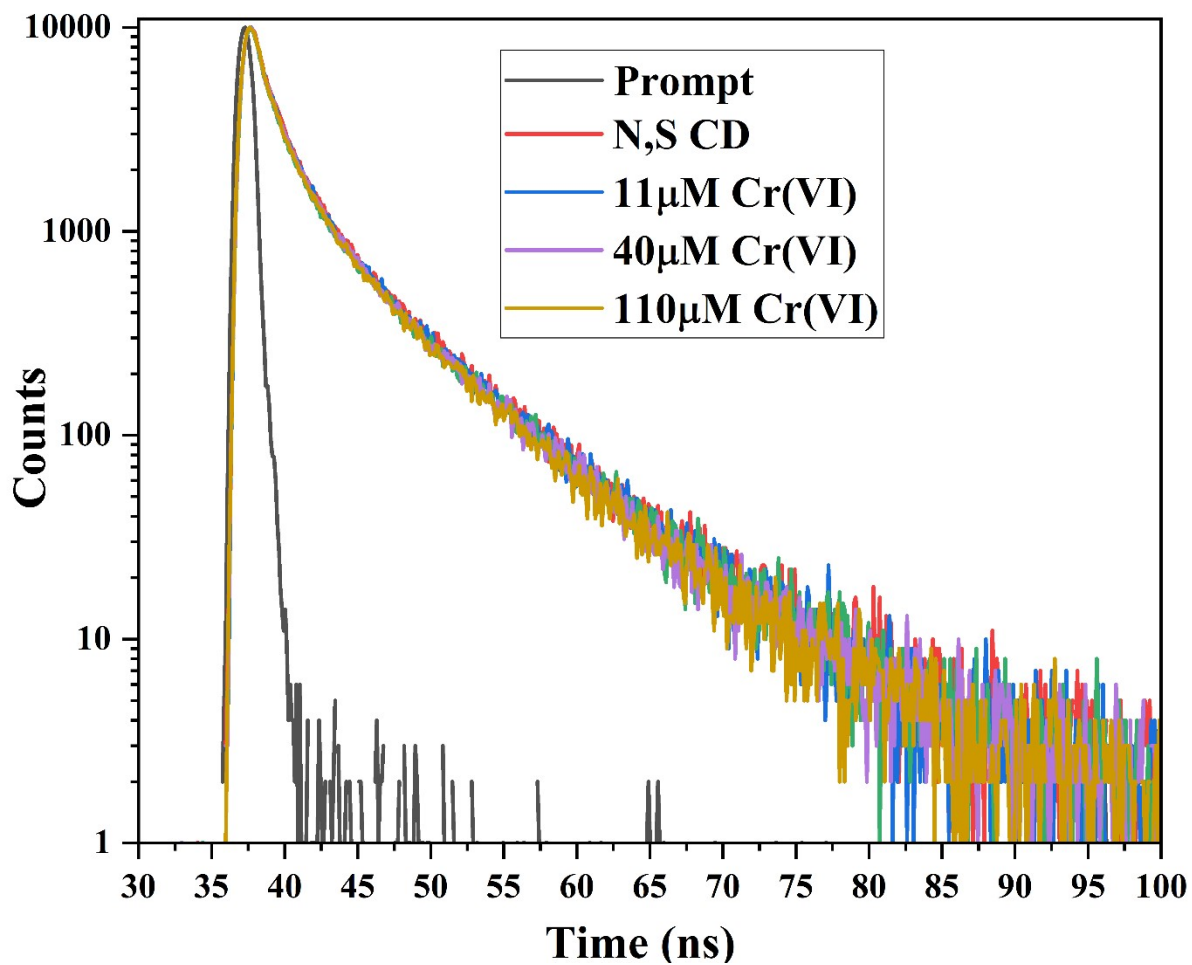

Fig 22S Decay time profile of NS CDs in absence and presence of Cr(VI)

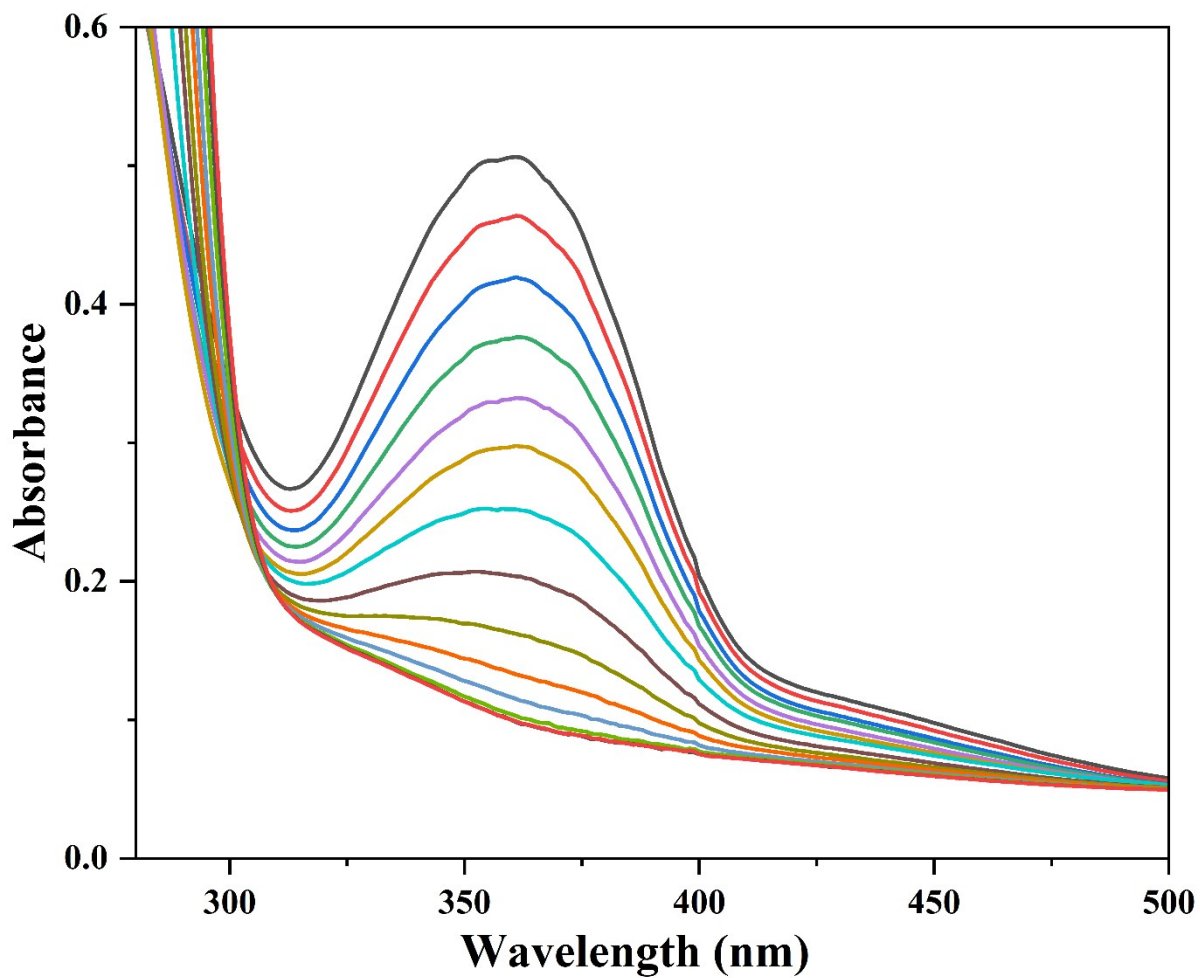

**Fig 23S** Absorption spectrum of NS CDs – Cr(VI) in presence of increasing concentration of ascorbic acid

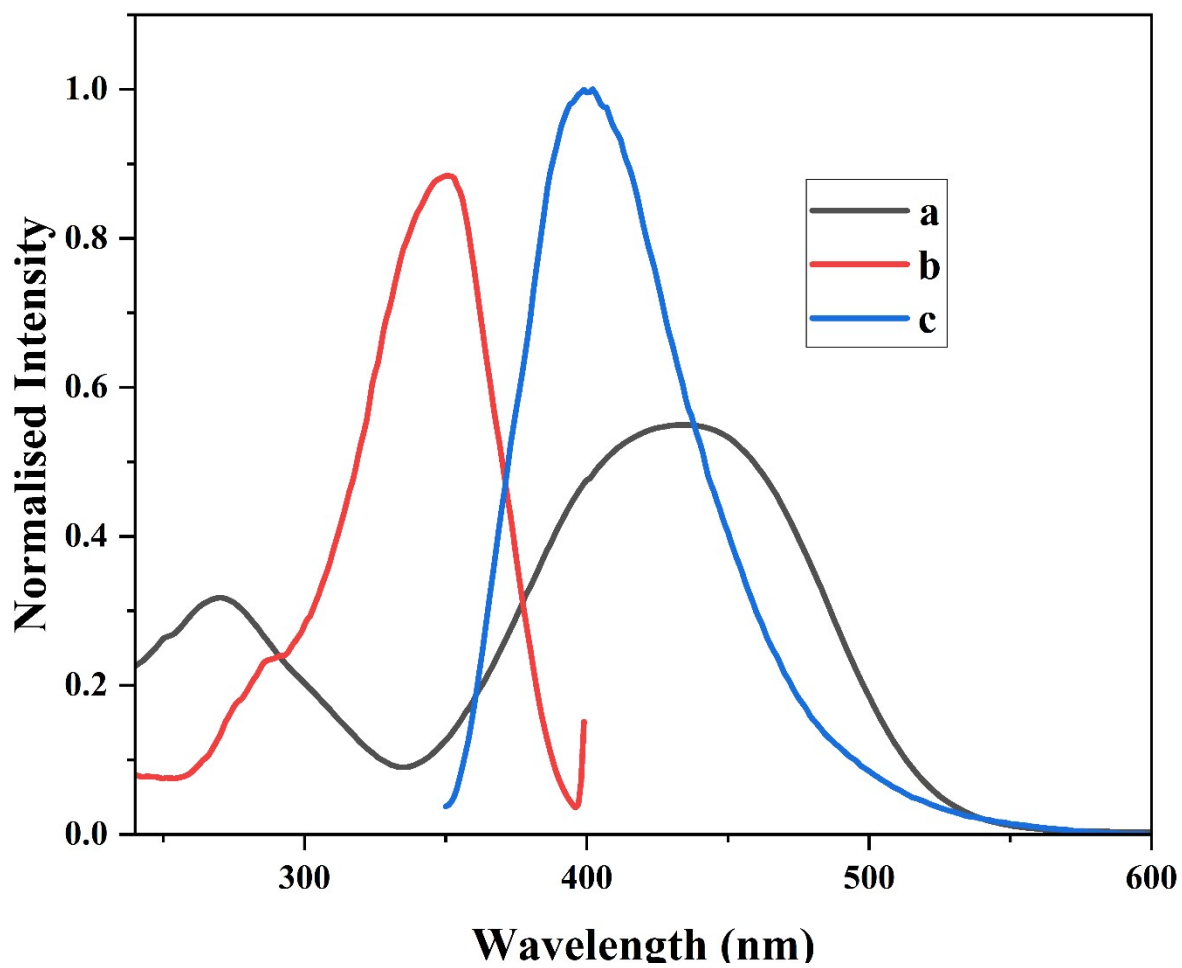

**Fig. 24S** Spectral overlap of absorption spectrum of Metanil Yellow (a) with emission (c) and excitation spectrum (b) of nanosensor

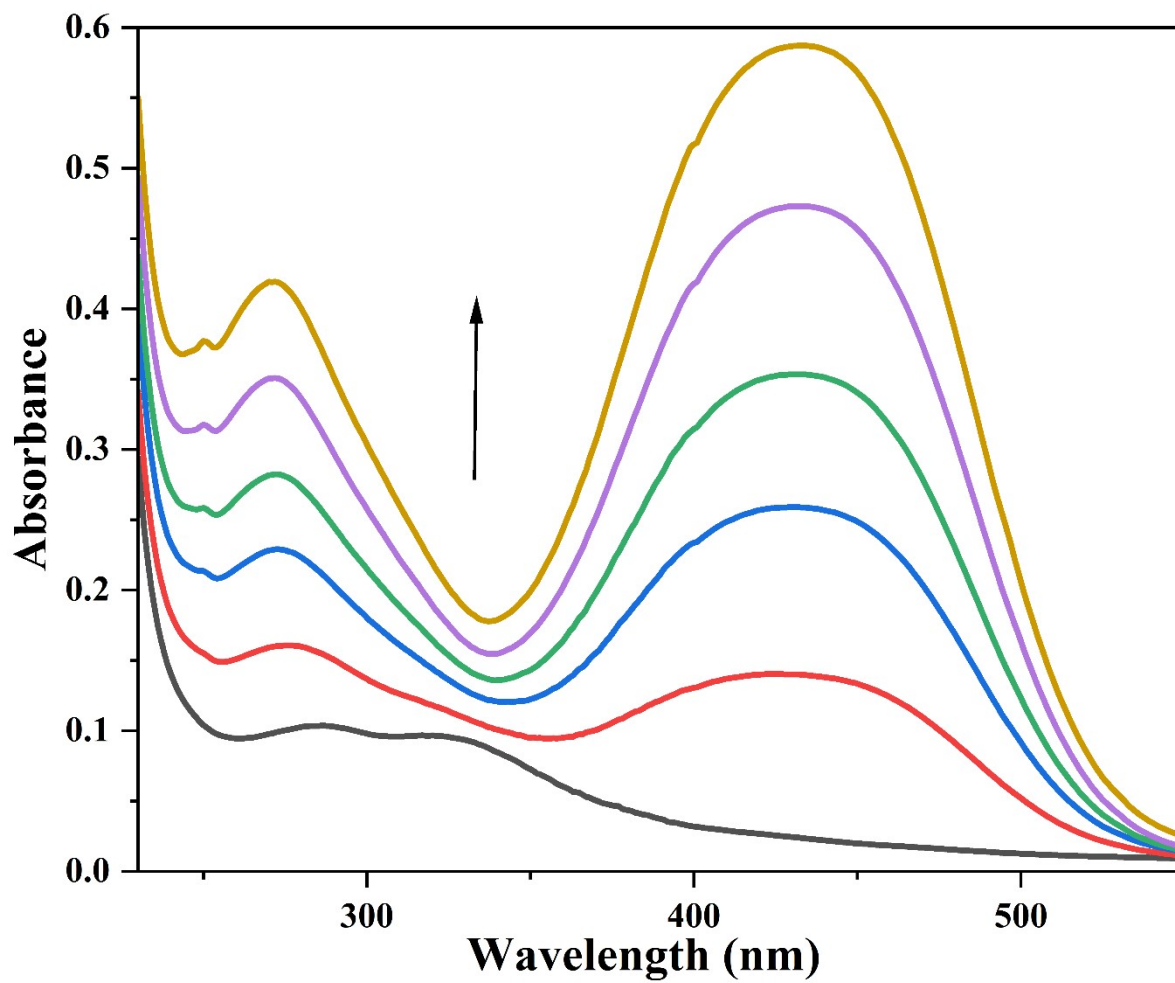

**Fig. 25S** Absorption spectrum of NS CDs – Cr(VI) in presence of increasing concentration of Metanil yellow.

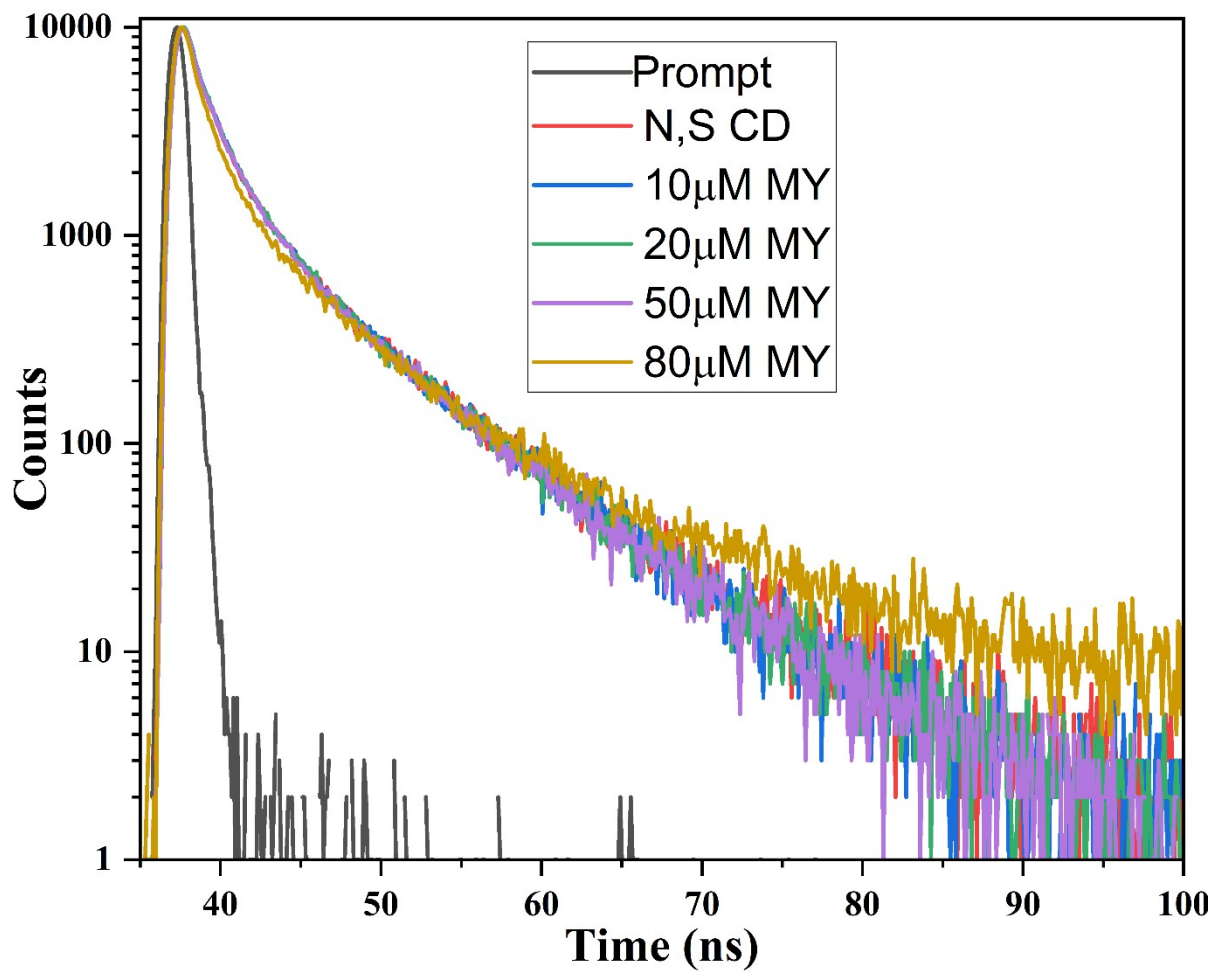

**Fig. 26S** Decay time profile of NS CDs in absence and presence of Metanil yellow.

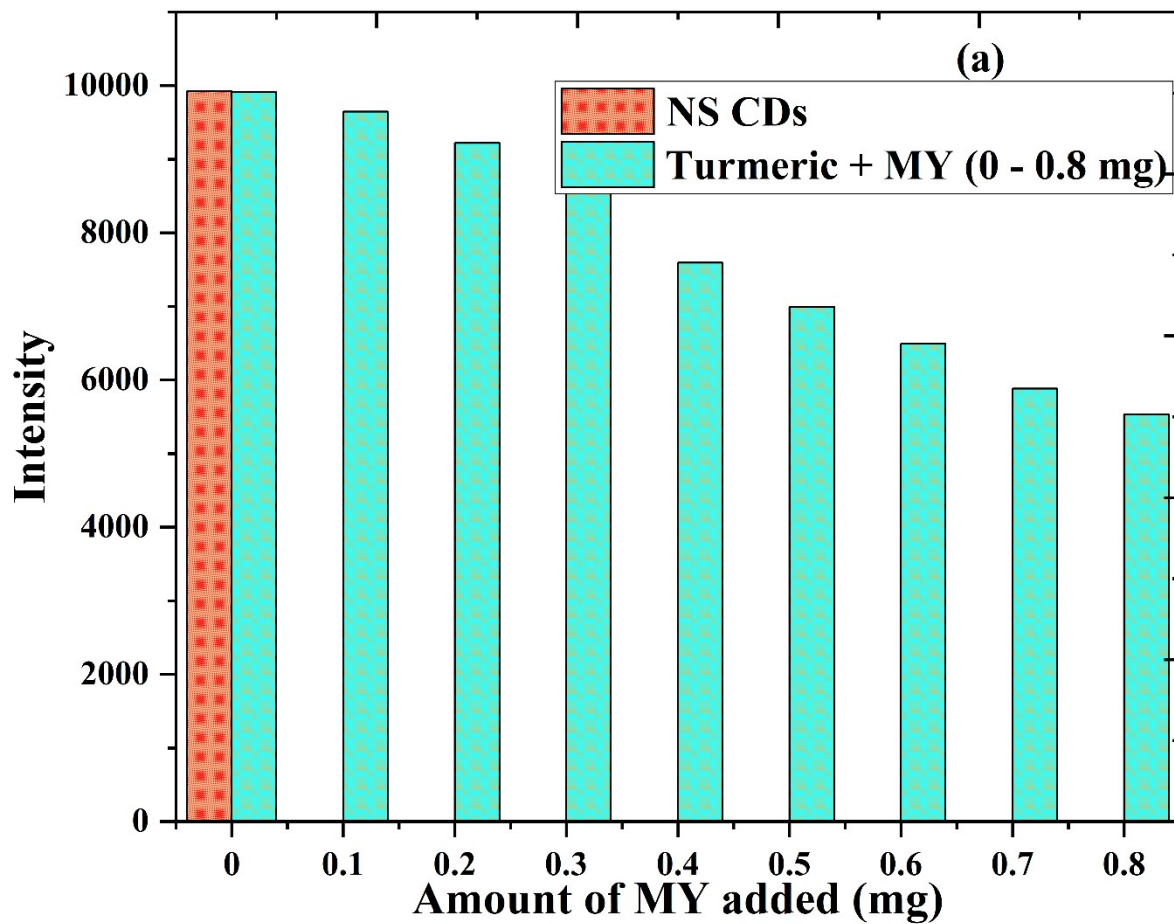

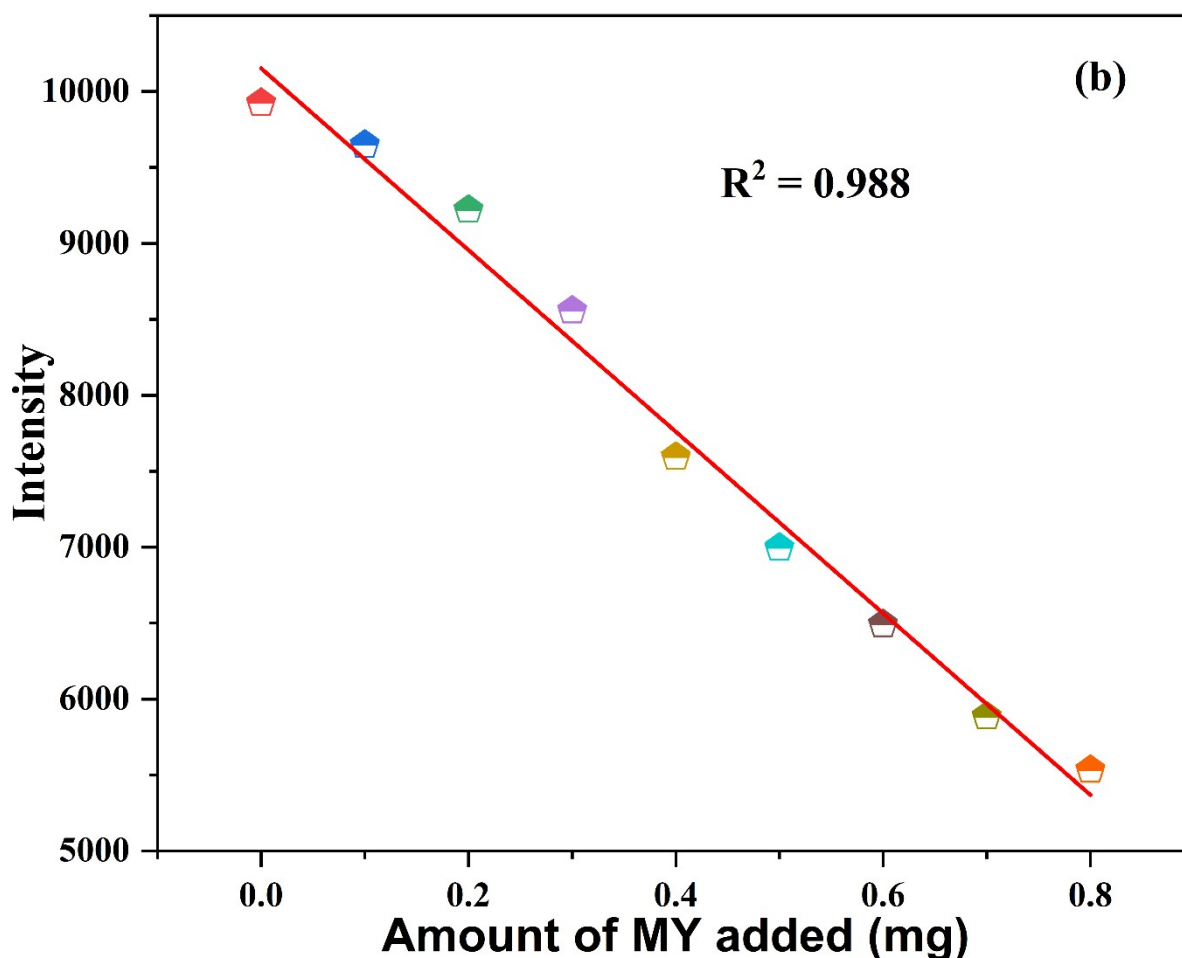

**Fig. 27S** The relationship between fluorescence intensity v/s the amount of Metanil Yellow (0–0.8 mg per 1000 mg turmeric powder) added in Turmeric Powder.

**Table 1S Quantum Yield Calculation** Integrated fluorescence intensity against absorbance

Formula used for calculation:

$$Q = Q_{\text{ref}} \frac{\eta^2 / \eta_{\text{ref}}^2 I / A}{A_{\text{ref}} / I_{\text{ref}}}$$

$\eta$  = Refractive Index of the solvent used.

$\eta_{\text{SAMPLE}} = 1.333$  for Water

$\eta_{\text{ref}} = 1.33$  for 0.1M H<sub>2</sub>SO<sub>4</sub>

$Q_{\text{ref}} = 0.546$  (Quantum yield of QUININE SULFATE)

$I$  = Integrated Fluorescence intensity of NS CDs

$I_{\text{ref}}$  = Integrated Fluorescence intensity of reference

$A$  = Absorbance at the excitation wavelength of NS CDs

$A_{\text{ref}}$  = Absorbance at the excitation wavelength of reference

| QY of reference   | Area of NS CDs | OD of Reference | Refractive index of sample solvent | Area of Ref | OD of NS CDs | Refractive index of ref solvent | QY             |
|-------------------|----------------|-----------------|------------------------------------|-------------|--------------|---------------------------------|----------------|
| 0.546             | 70793281       | 0.026221        | 1.333                              | 110724735   | 0.027619     | 1.33                            | 0.32778        |
| 0.546             | 97870331       | 0.032273        | 1.333                              | 156091030   | 0.032325     | 1.33                            | 0.33804        |
| 0.546             | 182198157      | 0.052567        | 1.333                              | 273899865   | 0.057418     | 1.33                            | 0.32886        |
| 0.546             | 202953529      | 0.065006        | 1.333                              | 330025815   | 0.064582     | 1.33                            | 0.33426        |
| <b>Average QY</b> |                |                 |                                    |             |              |                                 | <b>0.33223</b> |
|                   |                |                 |                                    |             |              |                                 |                |

**Table 2S Quantum Yield Calculation** Integrated fluorescence intensity against absorbance

Formula used for calculation:

$$Q = Q_{\text{ref}} \frac{\eta^2 / \eta_{\text{ref}}^2 I / A}{A_{\text{ref}} / I_{\text{ref}}}$$

$\eta$  = Refractive Index of the solvent used.

$\eta_{\text{SAMPLE}} = 1.333$  for Water

$\eta_{\text{ref}} = 1.33$  for 0.1M H<sub>2</sub>SO<sub>4</sub>

$Q_{\text{ref}} = 0.546$  (Quantum yield of QUININE SULFATE)

$I$  = Integrated Fluorescence intensity of NCDs

$I_{\text{ref}}$  = Integrated Fluorescence intensity of reference

$A$  = Absorbance at the excitation wavelength of NCDs

$A_{\text{ref}}$  = Absorbance at the excitation wavelength of reference



| QY of reference   | Area of NCDs | OD of Reference | Refractive index of sample solvent | Area of Ref | OD of NCDs | Refractive index of ref solvent | QY                 |
|-------------------|--------------|-----------------|------------------------------------|-------------|------------|---------------------------------|--------------------|
| 0.546             | 28387980     | 0.026221        | 1.333                              | 110724735   | 0.027619   | 1.33                            | 0.133499857        |
| 0.546             | 41230820     | 0.032273        | 1.333                              | 156091030   | 0.032325   | 1.33                            | 0.144642024        |
| 0.546             | 73109135     | 0.052567        | 1.333                              | 273899865   | 0.057418   | 1.33                            | 0.134027717        |
| 0.546             | 83596770     | 0.065006        | 1.333                              | 330025815   | 0.064582   | 1.33                            | 0.139840574        |
| <b>Average QY</b> |              |                 |                                    |             |            |                                 | <b>0.138002543</b> |

**Table 3S** Comparison of methods for Cr(VI) determination

| Detection method                                      | Linear Range            | Detection Limit      | Reference |
|-------------------------------------------------------|-------------------------|----------------------|-----------|
| Electrochemical<br>Technique                          | 2-200 $\mu\text{M}$     | 0.9 $\mu\text{M}$    | 1         |
| Graphite Furnace<br>Atomic absorption<br>Spectroscopy | 0.038-3.1 $\mu\text{M}$ | 0.001 $\mu\text{M}$  | 2         |
| Spectro fluorimetry                                   | 0.05-2 $\mu\text{M}$    | 0.0055 $\mu\text{M}$ | 3         |
| Colorimetric assay                                    | 0.16-24 $\mu\text{M}$   | 0.15 $\mu\text{M}$   | 4         |
| Colorimetric assay                                    | 0- 100 $\mu\text{g/L}$  | 1.43 $\mu\text{G/L}$ | 5         |
| Electrochemical<br>Technique                          | 0.10-105 $\mu\text{M}$  | 0.03 $\mu\text{M}$   | 6         |
| Fluorescence<br>Spectroscopy                          | 0.05-500 $\mu\text{M}$  | 0.0037 $\mu\text{M}$ | 7         |
| Fluorescence<br>Spectroscopy                          | 0.05-10 $\mu\text{M}$   | 0.015 $\mu\text{M}$  | 8         |

|                           |                    |                     |           |
|---------------------------|--------------------|---------------------|-----------|
| Fluorescence spectroscopy | 3-60 $\mu\text{M}$ | 0.056 $\mu\text{M}$ | This work |
|---------------------------|--------------------|---------------------|-----------|

**Table 4S** Comparison of methods for Metanil yellow determination

| Detection method | Linear Range         | Detection Limit      | Reference |
|------------------|----------------------|----------------------|-----------|
| FT-IR            | not given            | 5% concentration     | 9         |
| Fluorescence     | not given            | 3.83 nM/ml           | 10        |
| Electrochemical  | not given            | 9.8 nM               | 11        |
| Electrochemical  | not given            | not given            | 12        |
| Fluorescence     | 3 -100 $\mu\text{M}$ | 0.0073 $\mu\text{M}$ | 13        |

**Table 5S** Triple exponential fitting parameters of NS CDs and ND CDs-Cr(VI) decay curves

| Concentration of Cr(VI) ( $\mu\text{M}$ )                                                                                                    | $\tau_1$ (nm) | $B_1$ | $\tau_2$ (nm) | $B_2$ | $\tau_3$ (nm) | $B_3$ | $\tau$ (nm) | CHISQ |
|----------------------------------------------------------------------------------------------------------------------------------------------|---------------|-------|---------------|-------|---------------|-------|-------------|-------|
| 0                                                                                                                                            | 1.88          | 43.25 | 0.135         | 23.79 | 7.53          | 32.96 | 3.3         | 1.04  |
| 11                                                                                                                                           | 1.76          | 36.83 | 0.0832        | 32.97 | 7.26          | 30.20 | 2.87        | 1.05  |
| 40                                                                                                                                           | 1.82          | 37.70 | 0.0864        | 31.92 | 7.11          | 30.38 | 2.87        | 1.05  |
| 110                                                                                                                                          | 1.71          | 37.65 | 0.0884        | 30.92 | 6.85          | 31.43 | 2.82        | 1.05  |
| $\tau = \tau_1 \times B_1 + \tau_2 \times B_2 + \tau_3 \times B_3$<br>$(\sum B_i = 1, \text{ for good fit, CHISQ should be less than } 1.2)$ |               |       |               |       |               |       |             |       |

**Table 6S** Triple exponential fitting parameters of NS CDs and ND CDs-metanyl yellow decay curves

| Concentration of Cr(VI)<br>( $\mu\text{M}$ )                                                                                          | $\tau_1$<br>(nm) | $B_1$ | $\tau_2$<br>(nm) | $B_2$ | $\tau_3$<br>(nm) | $B_3$ | $\tau$<br>(nm) | CHISQ |
|---------------------------------------------------------------------------------------------------------------------------------------|------------------|-------|------------------|-------|------------------|-------|----------------|-------|
| 0                                                                                                                                     | 1.88             | 43.25 | 0.135            | 23.79 | 7.53             | 32.96 | 3.3            | 1.04  |
| 10                                                                                                                                    | 1.81             | 39.58 | 0.0782           | 29.66 | 7.26             | 30.76 | 2.97           | 1.03  |
| 20                                                                                                                                    | 1.88             | 44.45 | 0.142            | 22.52 | 7.36             | 33.03 | 3.3            | 1.02  |
| 50                                                                                                                                    | 1.84             | 43.14 | 0.126            | 23.51 | 7.15             | 33.34 | 3.2            | 1.04  |
| $\tau = \tau_1 \times B_1 + \tau_2 \times B_2 + \tau_3 \times B_3$<br>( $\sum B_i = 1$ , for good fit, CHISQ should be less than 1.2) |                  |       |                  |       |                  |       |                |       |

## References

- 1 D. Li, J. Li, X. Jia, Y. Xia, X. Zhang and E. Wang, *Anal. Chim. Acta*, 2013, **804**, 98–103.
- 2 Y. Gu and X. Zhu, *Microchim. Acta*, 2011, **173**, 433–438.
- 3 Y. Xiang, L. Mei, N. Li and A. Tong, *Anal. Chim. Acta*, 2007, **581**, 132–136.
- 4 J. Li, H. Wei, S. Guo and E. Wang, *Anal. Chim. Acta*, 2008, **630**, 181–185.
- 5 S. Danwittayakul and A. Thanaboonsombut, *NU Sci. J. 2009;*, 2009, **6**, 64–72.
- 6 W. Jin, G. Wu and A. Chen, *Analyst*, 2014, **139**, 235–241.
- 7 S. Huang, H. Qiu, F. Zhu, S. Lu and Q. Xiao, *Microchim. Acta*, 2015, **182**, 1723–1731.
- 8 X. Liu, T. Li, Q. Wu, X. Yan, C. Wu, X. Chen and G. Zhang, *Talanta*, 2017, **165**, 216–

222.

- 9 S. Dhakal, K. Chao, W. Schmidt, J. Qin, M. Kim and D. Chan, *Foods*, 2016, **5**, 36.
- 10 T. Dutta and S. Sarkar, *Appl. Nanosci.*, 2016, **6**, 1191–1197.
- 11 A. Shah, *ACS Omega*, 2020, **5**, 6187–6193.
- 12 R. Jain, N. Sharma and K. Radhapyari, *Eur. Water*, 2009, **27**, 43–52.
- 13 A. Abbasi, I. I. Ansari and M. Shakir, *J. Fluoresc.*, 2021, **31**, 1353–1361.
